# Supplementary material
Source: publisher site journal article supplement (https://www.spandidos-publications.com/4483/downloadSupplementary)
Supplement: Supplementary file 1 [file downloadSupplementary]

## Sheet: GSE65071
Table SI. Clinical information of enrolled osteosarcoma datasets.
Samples	title	geo_accession	status	submission_date	last_update_date	type	channel_count	source_name_ch1	organism_ch1	characteristics_ch1	characteristics_ch1.1	molecule_ch1	extract_protocol_ch1	label_ch1	label_protocol_ch1	taxid_ch1	hyb_protocol	scan_protocol	description	data_processing	platform_id	contact_name	contact_email	contact_department	contact_institute	contact_address	contact_city	contact_state	contact_zip/postal_code	contact_country	supplementary_file	data_row_count	disease state:ch1	os type:ch1
GSM1586740	Control 1	GSM1586740	Public on Jan 17 2015	Jan 16 2015	Feb 18 2015	RNA	1	plasma	Homo sapiens	disease state: healthy		total RNA	Plasma preparation and RNA extraction are described above	with the exception that 250 ul of human plasma was passed through a 0.22 micron filter and a total volume of 200 ul was used for RNA extraction. The organic extraction was up-scaled and 100 ul of Qiazol reagent and 200 ul of chloroform were used. RNA was extracted from the aqueous phase using the Qiagen miRNeasy kit as per manufacturer instructions and eluted in 50 碌l of nuclease free water.	biotin	First strand cDNA synthesis was performed from 2 ml of RNA (in 10 ml reactions) using the miRCURY universal cDNA synthesis kit per manufacturer instructions (Exiqon	Copenhagen). The spike-in synthetic RNAs were used as above to monitor the efficiency of the RNA extraction and cDNA synthesis. The cDNA was diluted 1:20 in nuclease free water and qPCR was performed as above and samples that did not meet quality control thresholds were omitted. Comprehensive miRNA expression profiling was completed using the Exiqon miRNome platform (human panels I+II	V3) as above on 20 disease samples (10 localized	10 metastatic) and 15 healthy controls to identify reference miRNAs in human OS plasma samples.	9606	n/a	n/a	control	Raw data were loaded on GenEx Pro version 5.4.3.710 from MultiD. After interplate calibration	data was tested for outliers with cutoff SD (cycles) = 0.25 and Grubbs test was performed with confidence level = 0.95. All outliers were deleted as recommended. Values above Cq > 37 were treated as background. All non-numerical values were replaced and miRNAs with 鈮?75% missing values	both within biological replicates and altogether	were removed from analysis. Missing values within biological replicates were generated by imputing while missing values were assigned a maximum of Cq = 38.	GPL19631	Chad		Creighton	creighto@bcm.tmc.edu	Biostatistics	Ducan Cancer Center	Baylor College of Medicine	One Baylor Plaza	Mail Stop: BCM305	Houston	TX	77030	USA	NONE	362	healthy	NA
GSM1586741	Control 2	GSM1586741	Public on Jan 17 2015	Jan 16 2015	Feb 18 2015	RNA	1	plasma	Homo sapiens	disease state: healthy		total RNA	Plasma preparation and RNA extraction are described above	with the exception that 250 ul of human plasma was passed through a 0.22 micron filter and a total volume of 200 ul was used for RNA extraction. The organic extraction was up-scaled and 100 ul of Qiazol reagent and 200 ul of chloroform were used. RNA was extracted from the aqueous phase using the Qiagen miRNeasy kit as per manufacturer instructions and eluted in 50 碌l of nuclease free water.	biotin	First strand cDNA synthesis was performed from 2 ml of RNA (in 10 ml reactions) using the miRCURY universal cDNA synthesis kit per manufacturer instructions (Exiqon	Copenhagen). The spike-in synthetic RNAs were used as above to monitor the efficiency of the RNA extraction and cDNA synthesis. The cDNA was diluted 1:20 in nuclease free water and qPCR was performed as above and samples that did not meet quality control thresholds were omitted. Comprehensive miRNA expression profiling was completed using the Exiqon miRNome platform (human panels I+II	V3) as above on 20 disease samples (10 localized	10 metastatic) and 15 healthy controls to identify reference miRNAs in human OS plasma samples.	9606	n/a	n/a	control	Raw data were loaded on GenEx Pro version 5.4.3.710 from MultiD. After interplate calibration	data was tested for outliers with cutoff SD (cycles) = 0.25 and Grubbs test was performed with confidence level = 0.95. All outliers were deleted as recommended. Values above Cq > 37 were treated as background. All non-numerical values were replaced and miRNAs with 鈮?75% missing values	both within biological replicates and altogether	were removed from analysis. Missing values within biological replicates were generated by imputing while missing values were assigned a maximum of Cq = 38.	GPL19631	Chad		Creighton	creighto@bcm.tmc.edu	Biostatistics	Ducan Cancer Center	Baylor College of Medicine	One Baylor Plaza	Mail Stop: BCM305	Houston	TX	77030	USA	NONE	362	healthy	NA
GSM1586742	Control 3	GSM1586742	Public on Jan 17 2015	Jan 16 2015	Feb 18 2015	RNA	1	plasma	Homo sapiens	disease state: healthy		total RNA	Plasma preparation and RNA extraction are described above	with the exception that 250 ul of human plasma was passed through a 0.22 micron filter and a total volume of 200 ul was used for RNA extraction. The organic extraction was up-scaled and 100 ul of Qiazol reagent and 200 ul of chloroform were used. RNA was extracted from the aqueous phase using the Qiagen miRNeasy kit as per manufacturer instructions and eluted in 50 碌l of nuclease free water.	biotin	First strand cDNA synthesis was performed from 2 ml of RNA (in 10 ml reactions) using the miRCURY universal cDNA synthesis kit per manufacturer instructions (Exiqon	Copenhagen). The spike-in synthetic RNAs were used as above to monitor the efficiency of the RNA extraction and cDNA synthesis. The cDNA was diluted 1:20 in nuclease free water and qPCR was performed as above and samples that did not meet quality control thresholds were omitted. Comprehensive miRNA expression profiling was completed using the Exiqon miRNome platform (human panels I+II	V3) as above on 20 disease samples (10 localized	10 metastatic) and 15 healthy controls to identify reference miRNAs in human OS plasma samples.	9606	n/a	n/a	control	Raw data were loaded on GenEx Pro version 5.4.3.710 from MultiD. After interplate calibration	data was tested for outliers with cutoff SD (cycles) = 0.25 and Grubbs test was performed with confidence level = 0.95. All outliers were deleted as recommended. Values above Cq > 37 were treated as background. All non-numerical values were replaced and miRNAs with 鈮?75% missing values	both within biological replicates and altogether	were removed from analysis. Missing values within biological replicates were generated by imputing while missing values were assigned a maximum of Cq = 38.	GPL19631	Chad		Creighton	creighto@bcm.tmc.edu	Biostatistics	Ducan Cancer Center	Baylor College of Medicine	One Baylor Plaza	Mail Stop: BCM305	Houston	TX	77030	USA	NONE	362	healthy	NA
GSM1586743	Control 4	GSM1586743	Public on Jan 17 2015	Jan 16 2015	Feb 18 2015	RNA	1	plasma	Homo sapiens	disease state: healthy		total RNA	Plasma preparation and RNA extraction are described above	with the exception that 250 ul of human plasma was passed through a 0.22 micron filter and a total volume of 200 ul was used for RNA extraction. The organic extraction was up-scaled and 100 ul of Qiazol reagent and 200 ul of chloroform were used. RNA was extracted from the aqueous phase using the Qiagen miRNeasy kit as per manufacturer instructions and eluted in 50 碌l of nuclease free water.	biotin	First strand cDNA synthesis was performed from 2 ml of RNA (in 10 ml reactions) using the miRCURY universal cDNA synthesis kit per manufacturer instructions (Exiqon	Copenhagen). The spike-in synthetic RNAs were used as above to monitor the efficiency of the RNA extraction and cDNA synthesis. The cDNA was diluted 1:20 in nuclease free water and qPCR was performed as above and samples that did not meet quality control thresholds were omitted. Comprehensive miRNA expression profiling was completed using the Exiqon miRNome platform (human panels I+II	V3) as above on 20 disease samples (10 localized	10 metastatic) and 15 healthy controls to identify reference miRNAs in human OS plasma samples.	9606	n/a	n/a	control	Raw data were loaded on GenEx Pro version 5.4.3.710 from MultiD. After interplate calibration	data was tested for outliers with cutoff SD (cycles) = 0.25 and Grubbs test was performed with confidence level = 0.95. All outliers were deleted as recommended. Values above Cq > 37 were treated as background. All non-numerical values were replaced and miRNAs with 鈮?75% missing values	both within biological replicates and altogether	were removed from analysis. Missing values within biological replicates were generated by imputing while missing values were assigned a maximum of Cq = 38.	GPL19631	Chad		Creighton	creighto@bcm.tmc.edu	Biostatistics	Ducan Cancer Center	Baylor College of Medicine	One Baylor Plaza	Mail Stop: BCM305	Houston	TX	77030	USA	NONE	362	healthy	NA
GSM1586744	Control 5	GSM1586744	Public on Jan 17 2015	Jan 16 2015	Feb 18 2015	RNA	1	plasma	Homo sapiens	disease state: healthy		total RNA	Plasma preparation and RNA extraction are described above	with the exception that 250 ul of human plasma was passed through a 0.22 micron filter and a total volume of 200 ul was used for RNA extraction. The organic extraction was up-scaled and 100 ul of Qiazol reagent and 200 ul of chloroform were used. RNA was extracted from the aqueous phase using the Qiagen miRNeasy kit as per manufacturer instructions and eluted in 50 碌l of nuclease free water.	biotin	First strand cDNA synthesis was performed from 2 ml of RNA (in 10 ml reactions) using the miRCURY universal cDNA synthesis kit per manufacturer instructions (Exiqon	Copenhagen). The spike-in synthetic RNAs were used as above to monitor the efficiency of the RNA extraction and cDNA synthesis. The cDNA was diluted 1:20 in nuclease free water and qPCR was performed as above and samples that did not meet quality control thresholds were omitted. Comprehensive miRNA expression profiling was completed using the Exiqon miRNome platform (human panels I+II	V3) as above on 20 disease samples (10 localized	10 metastatic) and 15 healthy controls to identify reference miRNAs in human OS plasma samples.	9606	n/a	n/a	control	Raw data were loaded on GenEx Pro version 5.4.3.710 from MultiD. After interplate calibration	data was tested for outliers with cutoff SD (cycles) = 0.25 and Grubbs test was performed with confidence level = 0.95. All outliers were deleted as recommended. Values above Cq > 37 were treated as background. All non-numerical values were replaced and miRNAs with 鈮?75% missing values	both within biological replicates and altogether	were removed from analysis. Missing values within biological replicates were generated by imputing while missing values were assigned a maximum of Cq = 38.	GPL19631	Chad		Creighton	creighto@bcm.tmc.edu	Biostatistics	Ducan Cancer Center	Baylor College of Medicine	One Baylor Plaza	Mail Stop: BCM305	Houston	TX	77030	USA	NONE	362	healthy	NA
GSM1586745	Control 6	GSM1586745	Public on Jan 17 2015	Jan 16 2015	Feb 18 2015	RNA	1	plasma	Homo sapiens	disease state: healthy		total RNA	Plasma preparation and RNA extraction are described above	with the exception that 250 ul of human plasma was passed through a 0.22 micron filter and a total volume of 200 ul was used for RNA extraction. The organic extraction was up-scaled and 100 ul of Qiazol reagent and 200 ul of chloroform were used. RNA was extracted from the aqueous phase using the Qiagen miRNeasy kit as per manufacturer instructions and eluted in 50 碌l of nuclease free water.	biotin	First strand cDNA synthesis was performed from 2 ml of RNA (in 10 ml reactions) using the miRCURY universal cDNA synthesis kit per manufacturer instructions (Exiqon	Copenhagen). The spike-in synthetic RNAs were used as above to monitor the efficiency of the RNA extraction and cDNA synthesis. The cDNA was diluted 1:20 in nuclease free water and qPCR was performed as above and samples that did not meet quality control thresholds were omitted. Comprehensive miRNA expression profiling was completed using the Exiqon miRNome platform (human panels I+II	V3) as above on 20 disease samples (10 localized	10 metastatic) and 15 healthy controls to identify reference miRNAs in human OS plasma samples.	9606	n/a	n/a	control	Raw data were loaded on GenEx Pro version 5.4.3.710 from MultiD. After interplate calibration	data was tested for outliers with cutoff SD (cycles) = 0.25 and Grubbs test was performed with confidence level = 0.95. All outliers were deleted as recommended. Values above Cq > 37 were treated as background. All non-numerical values were replaced and miRNAs with 鈮?75% missing values	both within biological replicates and altogether	were removed from analysis. Missing values within biological replicates were generated by imputing while missing values were assigned a maximum of Cq = 38.	GPL19631	Chad		Creighton	creighto@bcm.tmc.edu	Biostatistics	Ducan Cancer Center	Baylor College of Medicine	One Baylor Plaza	Mail Stop: BCM305	Houston	TX	77030	USA	NONE	362	healthy	NA
GSM1586746	Control 7	GSM1586746	Public on Jan 17 2015	Jan 16 2015	Feb 18 2015	RNA	1	plasma	Homo sapiens	disease state: healthy		total RNA	Plasma preparation and RNA extraction are described above	with the exception that 250 ul of human plasma was passed through a 0.22 micron filter and a total volume of 200 ul was used for RNA extraction. The organic extraction was up-scaled and 100 ul of Qiazol reagent and 200 ul of chloroform were used. RNA was extracted from the aqueous phase using the Qiagen miRNeasy kit as per manufacturer instructions and eluted in 50 碌l of nuclease free water.	biotin	First strand cDNA synthesis was performed from 2 ml of RNA (in 10 ml reactions) using the miRCURY universal cDNA synthesis kit per manufacturer instructions (Exiqon	Copenhagen). The spike-in synthetic RNAs were used as above to monitor the efficiency of the RNA extraction and cDNA synthesis. The cDNA was diluted 1:20 in nuclease free water and qPCR was performed as above and samples that did not meet quality control thresholds were omitted. Comprehensive miRNA expression profiling was completed using the Exiqon miRNome platform (human panels I+II	V3) as above on 20 disease samples (10 localized	10 metastatic) and 15 healthy controls to identify reference miRNAs in human OS plasma samples.	9606	n/a	n/a	control	Raw data were loaded on GenEx Pro version 5.4.3.710 from MultiD. After interplate calibration	data was tested for outliers with cutoff SD (cycles) = 0.25 and Grubbs test was performed with confidence level = 0.95. All outliers were deleted as recommended. Values above Cq > 37 were treated as background. All non-numerical values were replaced and miRNAs with 鈮?75% missing values	both within biological replicates and altogether	were removed from analysis. Missing values within biological replicates were generated by imputing while missing values were assigned a maximum of Cq = 38.	GPL19631	Chad		Creighton	creighto@bcm.tmc.edu	Biostatistics	Ducan Cancer Center	Baylor College of Medicine	One Baylor Plaza	Mail Stop: BCM305	Houston	TX	77030	USA	NONE	362	healthy	NA
GSM1586747	Control 8	GSM1586747	Public on Jan 17 2015	Jan 16 2015	Feb 18 2015	RNA	1	plasma	Homo sapiens	disease state: healthy		total RNA	Plasma preparation and RNA extraction are described above	with the exception that 250 ul of human plasma was passed through a 0.22 micron filter and a total volume of 200 ul was used for RNA extraction. The organic extraction was up-scaled and 100 ul of Qiazol reagent and 200 ul of chloroform were used. RNA was extracted from the aqueous phase using the Qiagen miRNeasy kit as per manufacturer instructions and eluted in 50 碌l of nuclease free water.	biotin	First strand cDNA synthesis was performed from 2 ml of RNA (in 10 ml reactions) using the miRCURY universal cDNA synthesis kit per manufacturer instructions (Exiqon	Copenhagen). The spike-in synthetic RNAs were used as above to monitor the efficiency of the RNA extraction and cDNA synthesis. The cDNA was diluted 1:20 in nuclease free water and qPCR was performed as above and samples that did not meet quality control thresholds were omitted. Comprehensive miRNA expression profiling was completed using the Exiqon miRNome platform (human panels I+II	V3) as above on 20 disease samples (10 localized	10 metastatic) and 15 healthy controls to identify reference miRNAs in human OS plasma samples.	9606	n/a	n/a	control	Raw data were loaded on GenEx Pro version 5.4.3.710 from MultiD. After interplate calibration	data was tested for outliers with cutoff SD (cycles) = 0.25 and Grubbs test was performed with confidence level = 0.95. All outliers were deleted as recommended. Values above Cq > 37 were treated as background. All non-numerical values were replaced and miRNAs with 鈮?75% missing values	both within biological replicates and altogether	were removed from analysis. Missing values within biological replicates were generated by imputing while missing values were assigned a maximum of Cq = 38.	GPL19631	Chad		Creighton	creighto@bcm.tmc.edu	Biostatistics	Ducan Cancer Center	Baylor College of Medicine	One Baylor Plaza	Mail Stop: BCM305	Houston	TX	77030	USA	NONE	362	healthy	NA
GSM1586748	Control 9	GSM1586748	Public on Jan 17 2015	Jan 16 2015	Feb 18 2015	RNA	1	plasma	Homo sapiens	disease state: healthy		total RNA	Plasma preparation and RNA extraction are described above	with the exception that 250 ul of human plasma was passed through a 0.22 micron filter and a total volume of 200 ul was used for RNA extraction. The organic extraction was up-scaled and 100 ul of Qiazol reagent and 200 ul of chloroform were used. RNA was extracted from the aqueous phase using the Qiagen miRNeasy kit as per manufacturer instructions and eluted in 50 碌l of nuclease free water.	biotin	First strand cDNA synthesis was performed from 2 ml of RNA (in 10 ml reactions) using the miRCURY universal cDNA synthesis kit per manufacturer instructions (Exiqon	Copenhagen). The spike-in synthetic RNAs were used as above to monitor the efficiency of the RNA extraction and cDNA synthesis. The cDNA was diluted 1:20 in nuclease free water and qPCR was performed as above and samples that did not meet quality control thresholds were omitted. Comprehensive miRNA expression profiling was completed using the Exiqon miRNome platform (human panels I+II	V3) as above on 20 disease samples (10 localized	10 metastatic) and 15 healthy controls to identify reference miRNAs in human OS plasma samples.	9606	n/a	n/a	control	Raw data were loaded on GenEx Pro version 5.4.3.710 from MultiD. After interplate calibration	data was tested for outliers with cutoff SD (cycles) = 0.25 and Grubbs test was performed with confidence level = 0.95. All outliers were deleted as recommended. Values above Cq > 37 were treated as background. All non-numerical values were replaced and miRNAs with 鈮?75% missing values	both within biological replicates and altogether	were removed from analysis. Missing values within biological replicates were generated by imputing while missing values were assigned a maximum of Cq = 38.	GPL19631	Chad		Creighton	creighto@bcm.tmc.edu	Biostatistics	Ducan Cancer Center	Baylor College of Medicine	One Baylor Plaza	Mail Stop: BCM305	Houston	TX	77030	USA	NONE	362	healthy	NA
GSM1586749	Control 10	GSM1586749	Public on Jan 17 2015	Jan 16 2015	Feb 18 2015	RNA	1	plasma	Homo sapiens	disease state: healthy		total RNA	Plasma preparation and RNA extraction are described above	with the exception that 250 ul of human plasma was passed through a 0.22 micron filter and a total volume of 200 ul was used for RNA extraction. The organic extraction was up-scaled and 100 ul of Qiazol reagent and 200 ul of chloroform were used. RNA was extracted from the aqueous phase using the Qiagen miRNeasy kit as per manufacturer instructions and eluted in 50 碌l of nuclease free water.	biotin	First strand cDNA synthesis was performed from 2 ml of RNA (in 10 ml reactions) using the miRCURY universal cDNA synthesis kit per manufacturer instructions (Exiqon	Copenhagen). The spike-in synthetic RNAs were used as above to monitor the efficiency of the RNA extraction and cDNA synthesis. The cDNA was diluted 1:20 in nuclease free water and qPCR was performed as above and samples that did not meet quality control thresholds were omitted. Comprehensive miRNA expression profiling was completed using the Exiqon miRNome platform (human panels I+II	V3) as above on 20 disease samples (10 localized	10 metastatic) and 15 healthy controls to identify reference miRNAs in human OS plasma samples.	9606	n/a	n/a	control	Raw data were loaded on GenEx Pro version 5.4.3.710 from MultiD. After interplate calibration	data was tested for outliers with cutoff SD (cycles) = 0.25 and Grubbs test was performed with confidence level = 0.95. All outliers were deleted as recommended. Values above Cq > 37 were treated as background. All non-numerical values were replaced and miRNAs with 鈮?75% missing values	both within biological replicates and altogether	were removed from analysis. Missing values within biological replicates were generated by imputing while missing values were assigned a maximum of Cq = 38.	GPL19631	Chad		Creighton	creighto@bcm.tmc.edu	Biostatistics	Ducan Cancer Center	Baylor College of Medicine	One Baylor Plaza	Mail Stop: BCM305	Houston	TX	77030	USA	NONE	362	healthy	NA
GSM1586750	Control 11	GSM1586750	Public on Jan 17 2015	Jan 16 2015	Feb 18 2015	RNA	1	plasma	Homo sapiens	disease state: healthy		total RNA	Plasma preparation and RNA extraction are described above	with the exception that 250 ul of human plasma was passed through a 0.22 micron filter and a total volume of 200 ul was used for RNA extraction. The organic extraction was up-scaled and 100 ul of Qiazol reagent and 200 ul of chloroform were used. RNA was extracted from the aqueous phase using the Qiagen miRNeasy kit as per manufacturer instructions and eluted in 50 碌l of nuclease free water.	biotin	First strand cDNA synthesis was performed from 2 ml of RNA (in 10 ml reactions) using the miRCURY universal cDNA synthesis kit per manufacturer instructions (Exiqon	Copenhagen). The spike-in synthetic RNAs were used as above to monitor the efficiency of the RNA extraction and cDNA synthesis. The cDNA was diluted 1:20 in nuclease free water and qPCR was performed as above and samples that did not meet quality control thresholds were omitted. Comprehensive miRNA expression profiling was completed using the Exiqon miRNome platform (human panels I+II	V3) as above on 20 disease samples (10 localized	10 metastatic) and 15 healthy controls to identify reference miRNAs in human OS plasma samples.	9606	n/a	n/a	control	Raw data were loaded on GenEx Pro version 5.4.3.710 from MultiD. After interplate calibration	data was tested for outliers with cutoff SD (cycles) = 0.25 and Grubbs test was performed with confidence level = 0.95. All outliers were deleted as recommended. Values above Cq > 37 were treated as background. All non-numerical values were replaced and miRNAs with 鈮?75% missing values	both within biological replicates and altogether	were removed from analysis. Missing values within biological replicates were generated by imputing while missing values were assigned a maximum of Cq = 38.	GPL19631	Chad		Creighton	creighto@bcm.tmc.edu	Biostatistics	Ducan Cancer Center	Baylor College of Medicine	One Baylor Plaza	Mail Stop: BCM305	Houston	TX	77030	USA	NONE	362	healthy	NA
GSM1586751	Control 12	GSM1586751	Public on Jan 17 2015	Jan 16 2015	Feb 18 2015	RNA	1	plasma	Homo sapiens	disease state: healthy		total RNA	Plasma preparation and RNA extraction are described above	with the exception that 250 ul of human plasma was passed through a 0.22 micron filter and a total volume of 200 ul was used for RNA extraction. The organic extraction was up-scaled and 100 ul of Qiazol reagent and 200 ul of chloroform were used. RNA was extracted from the aqueous phase using the Qiagen miRNeasy kit as per manufacturer instructions and eluted in 50 碌l of nuclease free water.	biotin	First strand cDNA synthesis was performed from 2 ml of RNA (in 10 ml reactions) using the miRCURY universal cDNA synthesis kit per manufacturer instructions (Exiqon	Copenhagen). The spike-in synthetic RNAs were used as above to monitor the efficiency of the RNA extraction and cDNA synthesis. The cDNA was diluted 1:20 in nuclease free water and qPCR was performed as above and samples that did not meet quality control thresholds were omitted. Comprehensive miRNA expression profiling was completed using the Exiqon miRNome platform (human panels I+II	V3) as above on 20 disease samples (10 localized	10 metastatic) and 15 healthy controls to identify reference miRNAs in human OS plasma samples.	9606	n/a	n/a	control	Raw data were loaded on GenEx Pro version 5.4.3.710 from MultiD. After interplate calibration	data was tested for outliers with cutoff SD (cycles) = 0.25 and Grubbs test was performed with confidence level = 0.95. All outliers were deleted as recommended. Values above Cq > 37 were treated as background. All non-numerical values were replaced and miRNAs with 鈮?75% missing values	both within biological replicates and altogether	were removed from analysis. Missing values within biological replicates were generated by imputing while missing values were assigned a maximum of Cq = 38.	GPL19631	Chad		Creighton	creighto@bcm.tmc.edu	Biostatistics	Ducan Cancer Center	Baylor College of Medicine	One Baylor Plaza	Mail Stop: BCM305	Houston	TX	77030	USA	NONE	362	healthy	NA
GSM1586752	Control 13	GSM1586752	Public on Jan 17 2015	Jan 16 2015	Feb 18 2015	RNA	1	plasma	Homo sapiens	disease state: healthy		total RNA	Plasma preparation and RNA extraction are described above	with the exception that 250 ul of human plasma was passed through a 0.22 micron filter and a total volume of 200 ul was used for RNA extraction. The organic extraction was up-scaled and 100 ul of Qiazol reagent and 200 ul of chloroform were used. RNA was extracted from the aqueous phase using the Qiagen miRNeasy kit as per manufacturer instructions and eluted in 50 碌l of nuclease free water.	biotin	First strand cDNA synthesis was performed from 2 ml of RNA (in 10 ml reactions) using the miRCURY universal cDNA synthesis kit per manufacturer instructions (Exiqon	Copenhagen). The spike-in synthetic RNAs were used as above to monitor the efficiency of the RNA extraction and cDNA synthesis. The cDNA was diluted 1:20 in nuclease free water and qPCR was performed as above and samples that did not meet quality control thresholds were omitted. Comprehensive miRNA expression profiling was completed using the Exiqon miRNome platform (human panels I+II	V3) as above on 20 disease samples (10 localized	10 metastatic) and 15 healthy controls to identify reference miRNAs in human OS plasma samples.	9606	n/a	n/a	control	Raw data were loaded on GenEx Pro version 5.4.3.710 from MultiD. After interplate calibration	data was tested for outliers with cutoff SD (cycles) = 0.25 and Grubbs test was performed with confidence level = 0.95. All outliers were deleted as recommended. Values above Cq > 37 were treated as background. All non-numerical values were replaced and miRNAs with 鈮?75% missing values	both within biological replicates and altogether	were removed from analysis. Missing values within biological replicates were generated by imputing while missing values were assigned a maximum of Cq = 38.	GPL19631	Chad		Creighton	creighto@bcm.tmc.edu	Biostatistics	Ducan Cancer Center	Baylor College of Medicine	One Baylor Plaza	Mail Stop: BCM305	Houston	TX	77030	USA	NONE	362	healthy	NA
GSM1586753	Control 14	GSM1586753	Public on Jan 17 2015	Jan 16 2015	Feb 18 2015	RNA	1	plasma	Homo sapiens	disease state: healthy		total RNA	Plasma preparation and RNA extraction are described above	with the exception that 250 ul of human plasma was passed through a 0.22 micron filter and a total volume of 200 ul was used for RNA extraction. The organic extraction was up-scaled and 100 ul of Qiazol reagent and 200 ul of chloroform were used. RNA was extracted from the aqueous phase using the Qiagen miRNeasy kit as per manufacturer instructions and eluted in 50 碌l of nuclease free water.	biotin	First strand cDNA synthesis was performed from 2 ml of RNA (in 10 ml reactions) using the miRCURY universal cDNA synthesis kit per manufacturer instructions (Exiqon	Copenhagen). The spike-in synthetic RNAs were used as above to monitor the efficiency of the RNA extraction and cDNA synthesis. The cDNA was diluted 1:20 in nuclease free water and qPCR was performed as above and samples that did not meet quality control thresholds were omitted. Comprehensive miRNA expression profiling was completed using the Exiqon miRNome platform (human panels I+II	V3) as above on 20 disease samples (10 localized	10 metastatic) and 15 healthy controls to identify reference miRNAs in human OS plasma samples.	9606	n/a	n/a	control	Raw data were loaded on GenEx Pro version 5.4.3.710 from MultiD. After interplate calibration	data was tested for outliers with cutoff SD (cycles) = 0.25 and Grubbs test was performed with confidence level = 0.95. All outliers were deleted as recommended. Values above Cq > 37 were treated as background. All non-numerical values were replaced and miRNAs with 鈮?75% missing values	both within biological replicates and altogether	were removed from analysis. Missing values within biological replicates were generated by imputing while missing values were assigned a maximum of Cq = 38.	GPL19631	Chad		Creighton	creighto@bcm.tmc.edu	Biostatistics	Ducan Cancer Center	Baylor College of Medicine	One Baylor Plaza	Mail Stop: BCM305	Houston	TX	77030	USA	NONE	362	healthy	NA
GSM1586754	Control 15	GSM1586754	Public on Jan 17 2015	Jan 16 2015	Feb 18 2015	RNA	1	plasma	Homo sapiens	disease state: healthy		total RNA	Plasma preparation and RNA extraction are described above	with the exception that 250 ul of human plasma was passed through a 0.22 micron filter and a total volume of 200 ul was used for RNA extraction. The organic extraction was up-scaled and 100 ul of Qiazol reagent and 200 ul of chloroform were used. RNA was extracted from the aqueous phase using the Qiagen miRNeasy kit as per manufacturer instructions and eluted in 50 碌l of nuclease free water.	biotin	First strand cDNA synthesis was performed from 2 ml of RNA (in 10 ml reactions) using the miRCURY universal cDNA synthesis kit per manufacturer instructions (Exiqon	Copenhagen). The spike-in synthetic RNAs were used as above to monitor the efficiency of the RNA extraction and cDNA synthesis. The cDNA was diluted 1:20 in nuclease free water and qPCR was performed as above and samples that did not meet quality control thresholds were omitted. Comprehensive miRNA expression profiling was completed using the Exiqon miRNome platform (human panels I+II	V3) as above on 20 disease samples (10 localized	10 metastatic) and 15 healthy controls to identify reference miRNAs in human OS plasma samples.	9606	n/a	n/a	control	Raw data were loaded on GenEx Pro version 5.4.3.710 from MultiD. After interplate calibration	data was tested for outliers with cutoff SD (cycles) = 0.25 and Grubbs test was performed with confidence level = 0.95. All outliers were deleted as recommended. Values above Cq > 37 were treated as background. All non-numerical values were replaced and miRNAs with 鈮?75% missing values	both within biological replicates and altogether	were removed from analysis. Missing values within biological replicates were generated by imputing while missing values were assigned a maximum of Cq = 38.	GPL19631	Chad		Creighton	creighto@bcm.tmc.edu	Biostatistics	Ducan Cancer Center	Baylor College of Medicine	One Baylor Plaza	Mail Stop: BCM305	Houston	TX	77030	USA	NONE	362	healthy	NA
GSM1586755	Disease 1	GSM1586755	Public on Jan 17 2015	Jan 16 2015	Feb 18 2015	RNA	1	plasma	Homo sapiens	disease state: osteosarcoma	os type: metastatic	total RNA	Plasma preparation and RNA extraction are described above	with the exception that 250 ul of human plasma was passed through a 0.22 micron filter and a total volume of 200 ul was used for RNA extraction. The organic extraction was up-scaled and 100 ul of Qiazol reagent and 200 ul of chloroform were used. RNA was extracted from the aqueous phase using the Qiagen miRNeasy kit as per manufacturer instructions and eluted in 50 碌l of nuclease free water.	biotin	First strand cDNA synthesis was performed from 2 ml of RNA (in 10 ml reactions) using the miRCURY universal cDNA synthesis kit per manufacturer instructions (Exiqon	Copenhagen). The spike-in synthetic RNAs were used as above to monitor the efficiency of the RNA extraction and cDNA synthesis. The cDNA was diluted 1:20 in nuclease free water and qPCR was performed as above and samples that did not meet quality control thresholds were omitted. Comprehensive miRNA expression profiling was completed using the Exiqon miRNome platform (human panels I+II	V3) as above on 20 disease samples (10 localized	10 metastatic) and 15 healthy controls to identify reference miRNAs in human OS plasma samples.	9606	n/a	n/a	Disease	Raw data were loaded on GenEx Pro version 5.4.3.710 from MultiD. After interplate calibration	data was tested for outliers with cutoff SD (cycles) = 0.25 and Grubbs test was performed with confidence level = 0.95. All outliers were deleted as recommended. Values above Cq > 37 were treated as background. All non-numerical values were replaced and miRNAs with 鈮?75% missing values	both within biological replicates and altogether	were removed from analysis. Missing values within biological replicates were generated by imputing while missing values were assigned a maximum of Cq = 38.	GPL19631	Chad		Creighton	creighto@bcm.tmc.edu	Biostatistics	Ducan Cancer Center	Baylor College of Medicine	One Baylor Plaza	Mail Stop: BCM305	Houston	TX	77030	USA	NONE	362	osteosarcoma	metastatic
GSM1586756	Disease 2	GSM1586756	Public on Jan 17 2015	Jan 16 2015	Feb 18 2015	RNA	1	plasma	Homo sapiens	disease state: osteosarcoma	os type: localized	total RNA	Plasma preparation and RNA extraction are described above	with the exception that 250 ul of human plasma was passed through a 0.22 micron filter and a total volume of 200 ul was used for RNA extraction. The organic extraction was up-scaled and 100 ul of Qiazol reagent and 200 ul of chloroform were used. RNA was extracted from the aqueous phase using the Qiagen miRNeasy kit as per manufacturer instructions and eluted in 50 碌l of nuclease free water.	biotin	First strand cDNA synthesis was performed from 2 ml of RNA (in 10 ml reactions) using the miRCURY universal cDNA synthesis kit per manufacturer instructions (Exiqon	Copenhagen). The spike-in synthetic RNAs were used as above to monitor the efficiency of the RNA extraction and cDNA synthesis. The cDNA was diluted 1:20 in nuclease free water and qPCR was performed as above and samples that did not meet quality control thresholds were omitted. Comprehensive miRNA expression profiling was completed using the Exiqon miRNome platform (human panels I+II	V3) as above on 20 disease samples (10 localized	10 metastatic) and 15 healthy controls to identify reference miRNAs in human OS plasma samples.	9606	n/a	n/a	Disease	Raw data were loaded on GenEx Pro version 5.4.3.710 from MultiD. After interplate calibration	data was tested for outliers with cutoff SD (cycles) = 0.25 and Grubbs test was performed with confidence level = 0.95. All outliers were deleted as recommended. Values above Cq > 37 were treated as background. All non-numerical values were replaced and miRNAs with 鈮?75% missing values	both within biological replicates and altogether	were removed from analysis. Missing values within biological replicates were generated by imputing while missing values were assigned a maximum of Cq = 38.	GPL19631	Chad		Creighton	creighto@bcm.tmc.edu	Biostatistics	Ducan Cancer Center	Baylor College of Medicine	One Baylor Plaza	Mail Stop: BCM305	Houston	TX	77030	USA	NONE	362	osteosarcoma	localized
GSM1586757	Disease 3	GSM1586757	Public on Jan 17 2015	Jan 16 2015	Feb 18 2015	RNA	1	plasma	Homo sapiens	disease state: osteosarcoma	os type: localized	total RNA	Plasma preparation and RNA extraction are described above	with the exception that 250 ul of human plasma was passed through a 0.22 micron filter and a total volume of 200 ul was used for RNA extraction. The organic extraction was up-scaled and 100 ul of Qiazol reagent and 200 ul of chloroform were used. RNA was extracted from the aqueous phase using the Qiagen miRNeasy kit as per manufacturer instructions and eluted in 50 碌l of nuclease free water.	biotin	First strand cDNA synthesis was performed from 2 ml of RNA (in 10 ml reactions) using the miRCURY universal cDNA synthesis kit per manufacturer instructions (Exiqon	Copenhagen). The spike-in synthetic RNAs were used as above to monitor the efficiency of the RNA extraction and cDNA synthesis. The cDNA was diluted 1:20 in nuclease free water and qPCR was performed as above and samples that did not meet quality control thresholds were omitted. Comprehensive miRNA expression profiling was completed using the Exiqon miRNome platform (human panels I+II	V3) as above on 20 disease samples (10 localized	10 metastatic) and 15 healthy controls to identify reference miRNAs in human OS plasma samples.	9606	n/a	n/a	Disease	Raw data were loaded on GenEx Pro version 5.4.3.710 from MultiD. After interplate calibration	data was tested for outliers with cutoff SD (cycles) = 0.25 and Grubbs test was performed with confidence level = 0.95. All outliers were deleted as recommended. Values above Cq > 37 were treated as background. All non-numerical values were replaced and miRNAs with 鈮?75% missing values	both within biological replicates and altogether	were removed from analysis. Missing values within biological replicates were generated by imputing while missing values were assigned a maximum of Cq = 38.	GPL19631	Chad		Creighton	creighto@bcm.tmc.edu	Biostatistics	Ducan Cancer Center	Baylor College of Medicine	One Baylor Plaza	Mail Stop: BCM305	Houston	TX	77030	USA	NONE	362	osteosarcoma	localized
GSM1586758	Disease 4	GSM1586758	Public on Jan 17 2015	Jan 16 2015	Feb 18 2015	RNA	1	plasma	Homo sapiens	disease state: osteosarcoma	os type: metastatic	total RNA	Plasma preparation and RNA extraction are described above	with the exception that 250 ul of human plasma was passed through a 0.22 micron filter and a total volume of 200 ul was used for RNA extraction. The organic extraction was up-scaled and 100 ul of Qiazol reagent and 200 ul of chloroform were used. RNA was extracted from the aqueous phase using the Qiagen miRNeasy kit as per manufacturer instructions and eluted in 50 碌l of nuclease free water.	biotin	First strand cDNA synthesis was performed from 2 ml of RNA (in 10 ml reactions) using the miRCURY universal cDNA synthesis kit per manufacturer instructions (Exiqon	Copenhagen). The spike-in synthetic RNAs were used as above to monitor the efficiency of the RNA extraction and cDNA synthesis. The cDNA was diluted 1:20 in nuclease free water and qPCR was performed as above and samples that did not meet quality control thresholds were omitted. Comprehensive miRNA expression profiling was completed using the Exiqon miRNome platform (human panels I+II	V3) as above on 20 disease samples (10 localized	10 metastatic) and 15 healthy controls to identify reference miRNAs in human OS plasma samples.	9606	n/a	n/a	Disease	Raw data were loaded on GenEx Pro version 5.4.3.710 from MultiD. After interplate calibration	data was tested for outliers with cutoff SD (cycles) = 0.25 and Grubbs test was performed with confidence level = 0.95. All outliers were deleted as recommended. Values above Cq > 37 were treated as background. All non-numerical values were replaced and miRNAs with 鈮?75% missing values	both within biological replicates and altogether	were removed from analysis. Missing values within biological replicates were generated by imputing while missing values were assigned a maximum of Cq = 38.	GPL19631	Chad		Creighton	creighto@bcm.tmc.edu	Biostatistics	Ducan Cancer Center	Baylor College of Medicine	One Baylor Plaza	Mail Stop: BCM305	Houston	TX	77030	USA	NONE	362	osteosarcoma	metastatic
GSM1586759	Disease 5	GSM1586759	Public on Jan 17 2015	Jan 16 2015	Feb 18 2015	RNA	1	plasma	Homo sapiens	disease state: osteosarcoma	os type: metastatic	total RNA	Plasma preparation and RNA extraction are described above	with the exception that 250 ul of human plasma was passed through a 0.22 micron filter and a total volume of 200 ul was used for RNA extraction. The organic extraction was up-scaled and 100 ul of Qiazol reagent and 200 ul of chloroform were used. RNA was extracted from the aqueous phase using the Qiagen miRNeasy kit as per manufacturer instructions and eluted in 50 碌l of nuclease free water.	biotin	First strand cDNA synthesis was performed from 2 ml of RNA (in 10 ml reactions) using the miRCURY universal cDNA synthesis kit per manufacturer instructions (Exiqon	Copenhagen). The spike-in synthetic RNAs were used as above to monitor the efficiency of the RNA extraction and cDNA synthesis. The cDNA was diluted 1:20 in nuclease free water and qPCR was performed as above and samples that did not meet quality control thresholds were omitted. Comprehensive miRNA expression profiling was completed using the Exiqon miRNome platform (human panels I+II	V3) as above on 20 disease samples (10 localized	10 metastatic) and 15 healthy controls to identify reference miRNAs in human OS plasma samples.	9606	n/a	n/a	Disease	Raw data were loaded on GenEx Pro version 5.4.3.710 from MultiD. After interplate calibration	data was tested for outliers with cutoff SD (cycles) = 0.25 and Grubbs test was performed with confidence level = 0.95. All outliers were deleted as recommended. Values above Cq > 37 were treated as background. All non-numerical values were replaced and miRNAs with 鈮?75% missing values	both within biological replicates and altogether	were removed from analysis. Missing values within biological replicates were generated by imputing while missing values were assigned a maximum of Cq = 38.	GPL19631	Chad		Creighton	creighto@bcm.tmc.edu	Biostatistics	Ducan Cancer Center	Baylor College of Medicine	One Baylor Plaza	Mail Stop: BCM305	Houston	TX	77030	USA	NONE	362	osteosarcoma	metastatic
GSM1586760	Disease 6	GSM1586760	Public on Jan 17 2015	Jan 16 2015	Feb 18 2015	RNA	1	plasma	Homo sapiens	disease state: osteosarcoma	os type: metastatic	total RNA	Plasma preparation and RNA extraction are described above	with the exception that 250 ul of human plasma was passed through a 0.22 micron filter and a total volume of 200 ul was used for RNA extraction. The organic extraction was up-scaled and 100 ul of Qiazol reagent and 200 ul of chloroform were used. RNA was extracted from the aqueous phase using the Qiagen miRNeasy kit as per manufacturer instructions and eluted in 50 碌l of nuclease free water.	biotin	First strand cDNA synthesis was performed from 2 ml of RNA (in 10 ml reactions) using the miRCURY universal cDNA synthesis kit per manufacturer instructions (Exiqon	Copenhagen). The spike-in synthetic RNAs were used as above to monitor the efficiency of the RNA extraction and cDNA synthesis. The cDNA was diluted 1:20 in nuclease free water and qPCR was performed as above and samples that did not meet quality control thresholds were omitted. Comprehensive miRNA expression profiling was completed using the Exiqon miRNome platform (human panels I+II	V3) as above on 20 disease samples (10 localized	10 metastatic) and 15 healthy controls to identify reference miRNAs in human OS plasma samples.	9606	n/a	n/a	Disease	Raw data were loaded on GenEx Pro version 5.4.3.710 from MultiD. After interplate calibration	data was tested for outliers with cutoff SD (cycles) = 0.25 and Grubbs test was performed with confidence level = 0.95. All outliers were deleted as recommended. Values above Cq > 37 were treated as background. All non-numerical values were replaced and miRNAs with 鈮?75% missing values	both within biological replicates and altogether	were removed from analysis. Missing values within biological replicates were generated by imputing while missing values were assigned a maximum of Cq = 38.	GPL19631	Chad		Creighton	creighto@bcm.tmc.edu	Biostatistics	Ducan Cancer Center	Baylor College of Medicine	One Baylor Plaza	Mail Stop: BCM305	Houston	TX	77030	USA	NONE	362	osteosarcoma	metastatic
GSM1586761	Disease 7	GSM1586761	Public on Jan 17 2015	Jan 16 2015	Feb 18 2015	RNA	1	plasma	Homo sapiens	disease state: osteosarcoma	os type: metastatic	total RNA	Plasma preparation and RNA extraction are described above	with the exception that 250 ul of human plasma was passed through a 0.22 micron filter and a total volume of 200 ul was used for RNA extraction. The organic extraction was up-scaled and 100 ul of Qiazol reagent and 200 ul of chloroform were used. RNA was extracted from the aqueous phase using the Qiagen miRNeasy kit as per manufacturer instructions and eluted in 50 碌l of nuclease free water.	biotin	First strand cDNA synthesis was performed from 2 ml of RNA (in 10 ml reactions) using the miRCURY universal cDNA synthesis kit per manufacturer instructions (Exiqon	Copenhagen). The spike-in synthetic RNAs were used as above to monitor the efficiency of the RNA extraction and cDNA synthesis. The cDNA was diluted 1:20 in nuclease free water and qPCR was performed as above and samples that did not meet quality control thresholds were omitted. Comprehensive miRNA expression profiling was completed using the Exiqon miRNome platform (human panels I+II	V3) as above on 20 disease samples (10 localized	10 metastatic) and 15 healthy controls to identify reference miRNAs in human OS plasma samples.	9606	n/a	n/a	Disease	Raw data were loaded on GenEx Pro version 5.4.3.710 from MultiD. After interplate calibration	data was tested for outliers with cutoff SD (cycles) = 0.25 and Grubbs test was performed with confidence level = 0.95. All outliers were deleted as recommended. Values above Cq > 37 were treated as background. All non-numerical values were replaced and miRNAs with 鈮?75% missing values	both within biological replicates and altogether	were removed from analysis. Missing values within biological replicates were generated by imputing while missing values were assigned a maximum of Cq = 38.	GPL19631	Chad		Creighton	creighto@bcm.tmc.edu	Biostatistics	Ducan Cancer Center	Baylor College of Medicine	One Baylor Plaza	Mail Stop: BCM305	Houston	TX	77030	USA	NONE	362	osteosarcoma	metastatic
GSM1586762	Disease 8	GSM1586762	Public on Jan 17 2015	Jan 16 2015	Feb 18 2015	RNA	1	plasma	Homo sapiens	disease state: osteosarcoma	os type: localized	total RNA	Plasma preparation and RNA extraction are described above	with the exception that 250 ul of human plasma was passed through a 0.22 micron filter and a total volume of 200 ul was used for RNA extraction. The organic extraction was up-scaled and 100 ul of Qiazol reagent and 200 ul of chloroform were used. RNA was extracted from the aqueous phase using the Qiagen miRNeasy kit as per manufacturer instructions and eluted in 50 碌l of nuclease free water.	biotin	First strand cDNA synthesis was performed from 2 ml of RNA (in 10 ml reactions) using the miRCURY universal cDNA synthesis kit per manufacturer instructions (Exiqon	Copenhagen). The spike-in synthetic RNAs were used as above to monitor the efficiency of the RNA extraction and cDNA synthesis. The cDNA was diluted 1:20 in nuclease free water and qPCR was performed as above and samples that did not meet quality control thresholds were omitted. Comprehensive miRNA expression profiling was completed using the Exiqon miRNome platform (human panels I+II	V3) as above on 20 disease samples (10 localized	10 metastatic) and 15 healthy controls to identify reference miRNAs in human OS plasma samples.	9606	n/a	n/a	Disease	Raw data were loaded on GenEx Pro version 5.4.3.710 from MultiD. After interplate calibration	data was tested for outliers with cutoff SD (cycles) = 0.25 and Grubbs test was performed with confidence level = 0.95. All outliers were deleted as recommended. Values above Cq > 37 were treated as background. All non-numerical values were replaced and miRNAs with 鈮?75% missing values	both within biological replicates and altogether	were removed from analysis. Missing values within biological replicates were generated by imputing while missing values were assigned a maximum of Cq = 38.	GPL19631	Chad		Creighton	creighto@bcm.tmc.edu	Biostatistics	Ducan Cancer Center	Baylor College of Medicine	One Baylor Plaza	Mail Stop: BCM305	Houston	TX	77030	USA	NONE	362	osteosarcoma	localized
GSM1586763	Disease 9	GSM1586763	Public on Jan 17 2015	Jan 16 2015	Feb 18 2015	RNA	1	plasma	Homo sapiens	disease state: osteosarcoma	os type: metastatic	total RNA	Plasma preparation and RNA extraction are described above	with the exception that 250 ul of human plasma was passed through a 0.22 micron filter and a total volume of 200 ul was used for RNA extraction. The organic extraction was up-scaled and 100 ul of Qiazol reagent and 200 ul of chloroform were used. RNA was extracted from the aqueous phase using the Qiagen miRNeasy kit as per manufacturer instructions and eluted in 50 碌l of nuclease free water.	biotin	First strand cDNA synthesis was performed from 2 ml of RNA (in 10 ml reactions) using the miRCURY universal cDNA synthesis kit per manufacturer instructions (Exiqon	Copenhagen). The spike-in synthetic RNAs were used as above to monitor the efficiency of the RNA extraction and cDNA synthesis. The cDNA was diluted 1:20 in nuclease free water and qPCR was performed as above and samples that did not meet quality control thresholds were omitted. Comprehensive miRNA expression profiling was completed using the Exiqon miRNome platform (human panels I+II	V3) as above on 20 disease samples (10 localized	10 metastatic) and 15 healthy controls to identify reference miRNAs in human OS plasma samples.	9606	n/a	n/a	Disease	Raw data were loaded on GenEx Pro version 5.4.3.710 from MultiD. After interplate calibration	data was tested for outliers with cutoff SD (cycles) = 0.25 and Grubbs test was performed with confidence level = 0.95. All outliers were deleted as recommended. Values above Cq > 37 were treated as background. All non-numerical values were replaced and miRNAs with 鈮?75% missing values	both within biological replicates and altogether	were removed from analysis. Missing values within biological replicates were generated by imputing while missing values were assigned a maximum of Cq = 38.	GPL19631	Chad		Creighton	creighto@bcm.tmc.edu	Biostatistics	Ducan Cancer Center	Baylor College of Medicine	One Baylor Plaza	Mail Stop: BCM305	Houston	TX	77030	USA	NONE	362	osteosarcoma	metastatic
GSM1586764	Disease 10	GSM1586764	Public on Jan 17 2015	Jan 16 2015	Feb 18 2015	RNA	1	plasma	Homo sapiens	disease state: osteosarcoma	os type: metastatic	total RNA	Plasma preparation and RNA extraction are described above	with the exception that 250 ul of human plasma was passed through a 0.22 micron filter and a total volume of 200 ul was used for RNA extraction. The organic extraction was up-scaled and 100 ul of Qiazol reagent and 200 ul of chloroform were used. RNA was extracted from the aqueous phase using the Qiagen miRNeasy kit as per manufacturer instructions and eluted in 50 碌l of nuclease free water.	biotin	First strand cDNA synthesis was performed from 2 ml of RNA (in 10 ml reactions) using the miRCURY universal cDNA synthesis kit per manufacturer instructions (Exiqon	Copenhagen). The spike-in synthetic RNAs were used as above to monitor the efficiency of the RNA extraction and cDNA synthesis. The cDNA was diluted 1:20 in nuclease free water and qPCR was performed as above and samples that did not meet quality control thresholds were omitted. Comprehensive miRNA expression profiling was completed using the Exiqon miRNome platform (human panels I+II	V3) as above on 20 disease samples (10 localized	10 metastatic) and 15 healthy controls to identify reference miRNAs in human OS plasma samples.	9606	n/a	n/a	Disease	Raw data were loaded on GenEx Pro version 5.4.3.710 from MultiD. After interplate calibration	data was tested for outliers with cutoff SD (cycles) = 0.25 and Grubbs test was performed with confidence level = 0.95. All outliers were deleted as recommended. Values above Cq > 37 were treated as background. All non-numerical values were replaced and miRNAs with 鈮?75% missing values	both within biological replicates and altogether	were removed from analysis. Missing values within biological replicates were generated by imputing while missing values were assigned a maximum of Cq = 38.	GPL19631	Chad		Creighton	creighto@bcm.tmc.edu	Biostatistics	Ducan Cancer Center	Baylor College of Medicine	One Baylor Plaza	Mail Stop: BCM305	Houston	TX	77030	USA	NONE	362	osteosarcoma	metastatic
GSM1586765	Disease 11	GSM1586765	Public on Jan 17 2015	Jan 16 2015	Feb 18 2015	RNA	1	plasma	Homo sapiens	disease state: osteosarcoma	os type: localized	total RNA	Plasma preparation and RNA extraction are described above	with the exception that 250 ul of human plasma was passed through a 0.22 micron filter and a total volume of 200 ul was used for RNA extraction. The organic extraction was up-scaled and 100 ul of Qiazol reagent and 200 ul of chloroform were used. RNA was extracted from the aqueous phase using the Qiagen miRNeasy kit as per manufacturer instructions and eluted in 50 碌l of nuclease free water.	biotin	First strand cDNA synthesis was performed from 2 ml of RNA (in 10 ml reactions) using the miRCURY universal cDNA synthesis kit per manufacturer instructions (Exiqon	Copenhagen). The spike-in synthetic RNAs were used as above to monitor the efficiency of the RNA extraction and cDNA synthesis. The cDNA was diluted 1:20 in nuclease free water and qPCR was performed as above and samples that did not meet quality control thresholds were omitted. Comprehensive miRNA expression profiling was completed using the Exiqon miRNome platform (human panels I+II	V3) as above on 20 disease samples (10 localized	10 metastatic) and 15 healthy controls to identify reference miRNAs in human OS plasma samples.	9606	n/a	n/a	Disease	Raw data were loaded on GenEx Pro version 5.4.3.710 from MultiD. After interplate calibration	data was tested for outliers with cutoff SD (cycles) = 0.25 and Grubbs test was performed with confidence level = 0.95. All outliers were deleted as recommended. Values above Cq > 37 were treated as background. All non-numerical values were replaced and miRNAs with 鈮?75% missing values	both within biological replicates and altogether	were removed from analysis. Missing values within biological replicates were generated by imputing while missing values were assigned a maximum of Cq = 38.	GPL19631	Chad		Creighton	creighto@bcm.tmc.edu	Biostatistics	Ducan Cancer Center	Baylor College of Medicine	One Baylor Plaza	Mail Stop: BCM305	Houston	TX	77030	USA	NONE	362	osteosarcoma	localized
GSM1586766	Disease 12	GSM1586766	Public on Jan 17 2015	Jan 16 2015	Feb 18 2015	RNA	1	plasma	Homo sapiens	disease state: osteosarcoma	os type: localized	total RNA	Plasma preparation and RNA extraction are described above	with the exception that 250 ul of human plasma was passed through a 0.22 micron filter and a total volume of 200 ul was used for RNA extraction. The organic extraction was up-scaled and 100 ul of Qiazol reagent and 200 ul of chloroform were used. RNA was extracted from the aqueous phase using the Qiagen miRNeasy kit as per manufacturer instructions and eluted in 50 碌l of nuclease free water.	biotin	First strand cDNA synthesis was performed from 2 ml of RNA (in 10 ml reactions) using the miRCURY universal cDNA synthesis kit per manufacturer instructions (Exiqon	Copenhagen). The spike-in synthetic RNAs were used as above to monitor the efficiency of the RNA extraction and cDNA synthesis. The cDNA was diluted 1:20 in nuclease free water and qPCR was performed as above and samples that did not meet quality control thresholds were omitted. Comprehensive miRNA expression profiling was completed using the Exiqon miRNome platform (human panels I+II	V3) as above on 20 disease samples (10 localized	10 metastatic) and 15 healthy controls to identify reference miRNAs in human OS plasma samples.	9606	n/a	n/a	Disease	Raw data were loaded on GenEx Pro version 5.4.3.710 from MultiD. After interplate calibration	data was tested for outliers with cutoff SD (cycles) = 0.25 and Grubbs test was performed with confidence level = 0.95. All outliers were deleted as recommended. Values above Cq > 37 were treated as background. All non-numerical values were replaced and miRNAs with 鈮?75% missing values	both within biological replicates and altogether	were removed from analysis. Missing values within biological replicates were generated by imputing while missing values were assigned a maximum of Cq = 38.	GPL19631	Chad		Creighton	creighto@bcm.tmc.edu	Biostatistics	Ducan Cancer Center	Baylor College of Medicine	One Baylor Plaza	Mail Stop: BCM305	Houston	TX	77030	USA	NONE	362	osteosarcoma	localized
GSM1586767	Disease 13	GSM1586767	Public on Jan 17 2015	Jan 16 2015	Feb 18 2015	RNA	1	plasma	Homo sapiens	disease state: osteosarcoma	os type: localized	total RNA	Plasma preparation and RNA extraction are described above	with the exception that 250 ul of human plasma was passed through a 0.22 micron filter and a total volume of 200 ul was used for RNA extraction. The organic extraction was up-scaled and 100 ul of Qiazol reagent and 200 ul of chloroform were used. RNA was extracted from the aqueous phase using the Qiagen miRNeasy kit as per manufacturer instructions and eluted in 50 碌l of nuclease free water.	biotin	First strand cDNA synthesis was performed from 2 ml of RNA (in 10 ml reactions) using the miRCURY universal cDNA synthesis kit per manufacturer instructions (Exiqon	Copenhagen). The spike-in synthetic RNAs were used as above to monitor the efficiency of the RNA extraction and cDNA synthesis. The cDNA was diluted 1:20 in nuclease free water and qPCR was performed as above and samples that did not meet quality control thresholds were omitted. Comprehensive miRNA expression profiling was completed using the Exiqon miRNome platform (human panels I+II	V3) as above on 20 disease samples (10 localized	10 metastatic) and 15 healthy controls to identify reference miRNAs in human OS plasma samples.	9606	n/a	n/a	Disease	Raw data were loaded on GenEx Pro version 5.4.3.710 from MultiD. After interplate calibration	data was tested for outliers with cutoff SD (cycles) = 0.25 and Grubbs test was performed with confidence level = 0.95. All outliers were deleted as recommended. Values above Cq > 37 were treated as background. All non-numerical values were replaced and miRNAs with 鈮?75% missing values	both within biological replicates and altogether	were removed from analysis. Missing values within biological replicates were generated by imputing while missing values were assigned a maximum of Cq = 38.	GPL19631	Chad		Creighton	creighto@bcm.tmc.edu	Biostatistics	Ducan Cancer Center	Baylor College of Medicine	One Baylor Plaza	Mail Stop: BCM305	Houston	TX	77030	USA	NONE	362	osteosarcoma	localized
GSM1586768	Disease 14	GSM1586768	Public on Jan 17 2015	Jan 16 2015	Feb 18 2015	RNA	1	plasma	Homo sapiens	disease state: osteosarcoma	os type: localized	total RNA	Plasma preparation and RNA extraction are described above	with the exception that 250 ul of human plasma was passed through a 0.22 micron filter and a total volume of 200 ul was used for RNA extraction. The organic extraction was up-scaled and 100 ul of Qiazol reagent and 200 ul of chloroform were used. RNA was extracted from the aqueous phase using the Qiagen miRNeasy kit as per manufacturer instructions and eluted in 50 碌l of nuclease free water.	biotin	First strand cDNA synthesis was performed from 2 ml of RNA (in 10 ml reactions) using the miRCURY universal cDNA synthesis kit per manufacturer instructions (Exiqon	Copenhagen). The spike-in synthetic RNAs were used as above to monitor the efficiency of the RNA extraction and cDNA synthesis. The cDNA was diluted 1:20 in nuclease free water and qPCR was performed as above and samples that did not meet quality control thresholds were omitted. Comprehensive miRNA expression profiling was completed using the Exiqon miRNome platform (human panels I+II	V3) as above on 20 disease samples (10 localized	10 metastatic) and 15 healthy controls to identify reference miRNAs in human OS plasma samples.	9606	n/a	n/a	Disease	Raw data were loaded on GenEx Pro version 5.4.3.710 from MultiD. After interplate calibration	data was tested for outliers with cutoff SD (cycles) = 0.25 and Grubbs test was performed with confidence level = 0.95. All outliers were deleted as recommended. Values above Cq > 37 were treated as background. All non-numerical values were replaced and miRNAs with 鈮?75% missing values	both within biological replicates and altogether	were removed from analysis. Missing values within biological replicates were generated by imputing while missing values were assigned a maximum of Cq = 38.	GPL19631	Chad		Creighton	creighto@bcm.tmc.edu	Biostatistics	Ducan Cancer Center	Baylor College of Medicine	One Baylor Plaza	Mail Stop: BCM305	Houston	TX	77030	USA	NONE	362	osteosarcoma	localized
GSM1586769	Disease 15	GSM1586769	Public on Jan 17 2015	Jan 16 2015	Feb 18 2015	RNA	1	plasma	Homo sapiens	disease state: osteosarcoma	os type: metastatic	total RNA	Plasma preparation and RNA extraction are described above	with the exception that 250 ul of human plasma was passed through a 0.22 micron filter and a total volume of 200 ul was used for RNA extraction. The organic extraction was up-scaled and 100 ul of Qiazol reagent and 200 ul of chloroform were used. RNA was extracted from the aqueous phase using the Qiagen miRNeasy kit as per manufacturer instructions and eluted in 50 碌l of nuclease free water.	biotin	First strand cDNA synthesis was performed from 2 ml of RNA (in 10 ml reactions) using the miRCURY universal cDNA synthesis kit per manufacturer instructions (Exiqon	Copenhagen). The spike-in synthetic RNAs were used as above to monitor the efficiency of the RNA extraction and cDNA synthesis. The cDNA was diluted 1:20 in nuclease free water and qPCR was performed as above and samples that did not meet quality control thresholds were omitted. Comprehensive miRNA expression profiling was completed using the Exiqon miRNome platform (human panels I+II	V3) as above on 20 disease samples (10 localized	10 metastatic) and 15 healthy controls to identify reference miRNAs in human OS plasma samples.	9606	n/a	n/a	Disease	Raw data were loaded on GenEx Pro version 5.4.3.710 from MultiD. After interplate calibration	data was tested for outliers with cutoff SD (cycles) = 0.25 and Grubbs test was performed with confidence level = 0.95. All outliers were deleted as recommended. Values above Cq > 37 were treated as background. All non-numerical values were replaced and miRNAs with 鈮?75% missing values	both within biological replicates and altogether	were removed from analysis. Missing values within biological replicates were generated by imputing while missing values were assigned a maximum of Cq = 38.	GPL19631	Chad		Creighton	creighto@bcm.tmc.edu	Biostatistics	Ducan Cancer Center	Baylor College of Medicine	One Baylor Plaza	Mail Stop: BCM305	Houston	TX	77030	USA	NONE	362	osteosarcoma	metastatic
GSM1586770	Disease 16	GSM1586770	Public on Jan 17 2015	Jan 16 2015	Feb 18 2015	RNA	1	plasma	Homo sapiens	disease state: osteosarcoma	os type: metastatic	total RNA	Plasma preparation and RNA extraction are described above	with the exception that 250 ul of human plasma was passed through a 0.22 micron filter and a total volume of 200 ul was used for RNA extraction. The organic extraction was up-scaled and 100 ul of Qiazol reagent and 200 ul of chloroform were used. RNA was extracted from the aqueous phase using the Qiagen miRNeasy kit as per manufacturer instructions and eluted in 50 碌l of nuclease free water.	biotin	First strand cDNA synthesis was performed from 2 ml of RNA (in 10 ml reactions) using the miRCURY universal cDNA synthesis kit per manufacturer instructions (Exiqon	Copenhagen). The spike-in synthetic RNAs were used as above to monitor the efficiency of the RNA extraction and cDNA synthesis. The cDNA was diluted 1:20 in nuclease free water and qPCR was performed as above and samples that did not meet quality control thresholds were omitted. Comprehensive miRNA expression profiling was completed using the Exiqon miRNome platform (human panels I+II	V3) as above on 20 disease samples (10 localized	10 metastatic) and 15 healthy controls to identify reference miRNAs in human OS plasma samples.	9606	n/a	n/a	Disease	Raw data were loaded on GenEx Pro version 5.4.3.710 from MultiD. After interplate calibration	data was tested for outliers with cutoff SD (cycles) = 0.25 and Grubbs test was performed with confidence level = 0.95. All outliers were deleted as recommended. Values above Cq > 37 were treated as background. All non-numerical values were replaced and miRNAs with 鈮?75% missing values	both within biological replicates and altogether	were removed from analysis. Missing values within biological replicates were generated by imputing while missing values were assigned a maximum of Cq = 38.	GPL19631	Chad		Creighton	creighto@bcm.tmc.edu	Biostatistics	Ducan Cancer Center	Baylor College of Medicine	One Baylor Plaza	Mail Stop: BCM305	Houston	TX	77030	USA	NONE	362	osteosarcoma	metastatic
GSM1586771	Disease 17	GSM1586771	Public on Jan 17 2015	Jan 16 2015	Feb 18 2015	RNA	1	plasma	Homo sapiens	disease state: osteosarcoma	os type: localized	total RNA	Plasma preparation and RNA extraction are described above	with the exception that 250 ul of human plasma was passed through a 0.22 micron filter and a total volume of 200 ul was used for RNA extraction. The organic extraction was up-scaled and 100 ul of Qiazol reagent and 200 ul of chloroform were used. RNA was extracted from the aqueous phase using the Qiagen miRNeasy kit as per manufacturer instructions and eluted in 50 碌l of nuclease free water.	biotin	First strand cDNA synthesis was performed from 2 ml of RNA (in 10 ml reactions) using the miRCURY universal cDNA synthesis kit per manufacturer instructions (Exiqon	Copenhagen). The spike-in synthetic RNAs were used as above to monitor the efficiency of the RNA extraction and cDNA synthesis. The cDNA was diluted 1:20 in nuclease free water and qPCR was performed as above and samples that did not meet quality control thresholds were omitted. Comprehensive miRNA expression profiling was completed using the Exiqon miRNome platform (human panels I+II	V3) as above on 20 disease samples (10 localized	10 metastatic) and 15 healthy controls to identify reference miRNAs in human OS plasma samples.	9606	n/a	n/a	Disease	Raw data were loaded on GenEx Pro version 5.4.3.710 from MultiD. After interplate calibration	data was tested for outliers with cutoff SD (cycles) = 0.25 and Grubbs test was performed with confidence level = 0.95. All outliers were deleted as recommended. Values above Cq > 37 were treated as background. All non-numerical values were replaced and miRNAs with 鈮?75% missing values	both within biological replicates and altogether	were removed from analysis. Missing values within biological replicates were generated by imputing while missing values were assigned a maximum of Cq = 38.	GPL19631	Chad		Creighton	creighto@bcm.tmc.edu	Biostatistics	Ducan Cancer Center	Baylor College of Medicine	One Baylor Plaza	Mail Stop: BCM305	Houston	TX	77030	USA	NONE	362	osteosarcoma	localized
GSM1586772	Disease 18	GSM1586772	Public on Jan 17 2015	Jan 16 2015	Feb 18 2015	RNA	1	plasma	Homo sapiens	disease state: osteosarcoma	os type: localized	total RNA	Plasma preparation and RNA extraction are described above	with the exception that 250 ul of human plasma was passed through a 0.22 micron filter and a total volume of 200 ul was used for RNA extraction. The organic extraction was up-scaled and 100 ul of Qiazol reagent and 200 ul of chloroform were used. RNA was extracted from the aqueous phase using the Qiagen miRNeasy kit as per manufacturer instructions and eluted in 50 碌l of nuclease free water.	biotin	First strand cDNA synthesis was performed from 2 ml of RNA (in 10 ml reactions) using the miRCURY universal cDNA synthesis kit per manufacturer instructions (Exiqon	Copenhagen). The spike-in synthetic RNAs were used as above to monitor the efficiency of the RNA extraction and cDNA synthesis. The cDNA was diluted 1:20 in nuclease free water and qPCR was performed as above and samples that did not meet quality control thresholds were omitted. Comprehensive miRNA expression profiling was completed using the Exiqon miRNome platform (human panels I+II	V3) as above on 20 disease samples (10 localized	10 metastatic) and 15 healthy controls to identify reference miRNAs in human OS plasma samples.	9606	n/a	n/a	Disease	Raw data were loaded on GenEx Pro version 5.4.3.710 from MultiD. After interplate calibration	data was tested for outliers with cutoff SD (cycles) = 0.25 and Grubbs test was performed with confidence level = 0.95. All outliers were deleted as recommended. Values above Cq > 37 were treated as background. All non-numerical values were replaced and miRNAs with 鈮?75% missing values	both within biological replicates and altogether	were removed from analysis. Missing values within biological replicates were generated by imputing while missing values were assigned a maximum of Cq = 38.	GPL19631	Chad		Creighton	creighto@bcm.tmc.edu	Biostatistics	Ducan Cancer Center	Baylor College of Medicine	One Baylor Plaza	Mail Stop: BCM305	Houston	TX	77030	USA	NONE	362	osteosarcoma	localized
GSM1586773	Disease 19	GSM1586773	Public on Jan 17 2015	Jan 16 2015	Feb 18 2015	RNA	1	plasma	Homo sapiens	disease state: osteosarcoma	os type: metastatic	total RNA	Plasma preparation and RNA extraction are described above	with the exception that 250 ul of human plasma was passed through a 0.22 micron filter and a total volume of 200 ul was used for RNA extraction. The organic extraction was up-scaled and 100 ul of Qiazol reagent and 200 ul of chloroform were used. RNA was extracted from the aqueous phase using the Qiagen miRNeasy kit as per manufacturer instructions and eluted in 50 碌l of nuclease free water.	biotin	First strand cDNA synthesis was performed from 2 ml of RNA (in 10 ml reactions) using the miRCURY universal cDNA synthesis kit per manufacturer instructions (Exiqon	Copenhagen). The spike-in synthetic RNAs were used as above to monitor the efficiency of the RNA extraction and cDNA synthesis. The cDNA was diluted 1:20 in nuclease free water and qPCR was performed as above and samples that did not meet quality control thresholds were omitted. Comprehensive miRNA expression profiling was completed using the Exiqon miRNome platform (human panels I+II	V3) as above on 20 disease samples (10 localized	10 metastatic) and 15 healthy controls to identify reference miRNAs in human OS plasma samples.	9606	n/a	n/a	Disease	Raw data were loaded on GenEx Pro version 5.4.3.710 from MultiD. After interplate calibration	data was tested for outliers with cutoff SD (cycles) = 0.25 and Grubbs test was performed with confidence level = 0.95. All outliers were deleted as recommended. Values above Cq > 37 were treated as background. All non-numerical values were replaced and miRNAs with 鈮?75% missing values	both within biological replicates and altogether	were removed from analysis. Missing values within biological replicates were generated by imputing while missing values were assigned a maximum of Cq = 38.	GPL19631	Chad		Creighton	creighto@bcm.tmc.edu	Biostatistics	Ducan Cancer Center	Baylor College of Medicine	One Baylor Plaza	Mail Stop: BCM305	Houston	TX	77030	USA	NONE	362	osteosarcoma	metastatic
GSM1586774	Disease 20	GSM1586774	Public on Jan 17 2015	Jan 16 2015	Feb 18 2015	RNA	1	plasma	Homo sapiens	disease state: osteosarcoma	os type: localized	total RNA	Plasma preparation and RNA extraction are described above	with the exception that 250 ul of human plasma was passed through a 0.22 micron filter and a total volume of 200 ul was used for RNA extraction. The organic extraction was up-scaled and 100 ul of Qiazol reagent and 200 ul of chloroform were used. RNA was extracted from the aqueous phase using the Qiagen miRNeasy kit as per manufacturer instructions and eluted in 50 碌l of nuclease free water.	biotin	First strand cDNA synthesis was performed from 2 ml of RNA (in 10 ml reactions) using the miRCURY universal cDNA synthesis kit per manufacturer instructions (Exiqon	Copenhagen). The spike-in synthetic RNAs were used as above to monitor the efficiency of the RNA extraction and cDNA synthesis. The cDNA was diluted 1:20 in nuclease free water and qPCR was performed as above and samples that did not meet quality control thresholds were omitted. Comprehensive miRNA expression profiling was completed using the Exiqon miRNome platform (human panels I+II	V3) as above on 20 disease samples (10 localized	10 metastatic) and 15 healthy controls to identify reference miRNAs in human OS plasma samples.	9606	n/a	n/a	Disease	Raw data were loaded on GenEx Pro version 5.4.3.710 from MultiD. After interplate calibration	data was tested for outliers with cutoff SD (cycles) = 0.25 and Grubbs test was performed with confidence level = 0.95. All outliers were deleted as recommended. Values above Cq > 37 were treated as background. All non-numerical values were replaced and miRNAs with 鈮?75% missing values	both within biological replicates and altogether	were removed from analysis. Missing values within biological replicates were generated by imputing while missing values were assigned a maximum of Cq = 38.	GPL19631	Chad		Creighton	creighto@bcm.tmc.edu	Biostatistics	Ducan Cancer Center	Baylor College of Medicine	One Baylor Plaza	Mail Stop: BCM305	Houston	TX	77030	USA	NONE	362	osteosarcoma	localized

## Sheet: GSE28423
Samples	title	geo_accession	status	submission_date	last_update_date	type	channel_count	source_name_ch1	organism_ch1	characteristics_ch1	molecule_ch1	extract_protocol_ch1	label_ch1	label_protocol_ch1	taxid_ch1	hyb_protocol	scan_protocol	description	data_processing	platform_id	contact_name	contact_email	contact_laboratory	contact_department	contact_institute	contact_address	contact_city	contact_zip/postal_code	contact_country	supplementary_file	data_row_count	cell line:ch1	tissue:ch1
GSM702467	OS cell line_1 [Agilent]	GSM702467	Public on Oct 16 2012	Apr 06 2011	Oct 16 2012	RNA	1	Osteosarcoma cell line	Homo sapiens	cell line: 143B	total RNA	Total RNA	including small RNAs	from cell lines and bones was extracted using the Qiagen miRNeasy Mini kit (Qiagen	California	USA) according to the manufacturer's protocol. RNA purity and quantity was measured on a NanoDrop ND-1000 spectrophotometer (Nanodrop Technologies	Wilmington	Delaware	USA)	and RNA integrity was evaluated using an Agilent 2100 Bioanalyzer (Agilent Technologies Inc.	Palo Alto	CA).	Cy3	Cyanine-3 (Cy3) labeled RNA was prepared from 100 ng total RNA using the miRNA Microarray System with miRNA Complete Labeling and Hyb Kit Version 2.0 (Agilent	USA) (P/N G4170-90011) according to the manufacturer's instructions	9606	Cy3 labelled RNA was resuspended in 18 ul nuclease-free water	4.5 ul 10x GE Blocking Agent and 22.5 ul 2x Hi-RPM Hybridization Buffer following the manufacturer鈥檚 instructions. The samples were hybridized to Agilent Human miRNA Microarrays (version 2	G4470B) for 20 hours at 55藲C in a rotating Agilent hybridization oven. After hybridization	microarrays were washed 5 minutes at room temperature with GE Wash Buffer 1(Agilent) and 5 minutes with 37藲C Wash Buffer 2 (Agilent)	and finally in acetonitrile 1 minute at room temperature (no stabilization and drying solution should be used). Protocol: miRNA Microarray System with miRNA Complete Labeling and Hyb Kit Version 2.0 (Agilent	USA). P/N G4170-90011.	Slides were scanned immediately after washing on the Agilent DNA Microarray Scanner (G2505B). Scan Area 61x21.6 mm	Scan resolution 5um	single pass. Dye channel is set to Green and with XDR Hi 100% and XDR Lo 5%.	The cell lines were maintained in RPMI 1640 (Invitrogen	Carsbad	CA	USA) supplemented with 10% fetal calf serum	2 mM L-glutamine (Invitrogen) and 1% Penicillin/Streptomycin (Invitrogen) under standard conditions.	The images were preprocessed using the Feature Extraction software package v9.5.1 (Agilent Technology) using default parameters (protocol miRNA-v1_95_May07 and Grid 019118_D_20080214). The data files were imported to Agilent GeneSpring GX10 for preprosessing and further statistical analysis. The intensity values were log2 transformed and quantile normalized.	GPL8227	Heidi	Maria	Naml酶s	heidina@rr-research.no	Department of Tumor Biology	Institute for cancer research	The Norwegian Radium Hospital
GSM702468	OS cell line_2 [Agilent]	GSM702468	Public on Oct 16 2012	Apr 06 2011	Oct 16 2012	RNA	1	Osteosarcoma cell line	Homo sapiens	cell line: HAL	total RNA	Total RNA	including small RNAs	from cell lines and bones was extracted using the Qiagen miRNeasy Mini kit (Qiagen	California	USA) according to the manufacturer's protocol. RNA purity and quantity was measured on a NanoDrop ND-1000 spectrophotometer (Nanodrop Technologies	Wilmington	Delaware	USA)	and RNA integrity was evaluated using an Agilent 2100 Bioanalyzer (Agilent Technologies Inc.	Palo Alto	CA).	Cy3	Cyanine-3 (Cy3) labeled RNA was prepared from 100 ng total RNA using the miRNA Microarray System with miRNA Complete Labeling and Hyb Kit Version 2.0 (Agilent	USA) (P/N G4170-90011) according to the manufacturer's instructions	9606	Cy3 labelled RNA was resuspended in 18 ul nuclease-free water	4.5 ul 10x GE Blocking Agent and 22.5 ul 2x Hi-RPM Hybridization Buffer following the manufacturer鈥檚 instructions. The samples were hybridized to Agilent Human miRNA Microarrays (version 2	G4470B) for 20 hours at 55藲C in a rotating Agilent hybridization oven. After hybridization	microarrays were washed 5 minutes at room temperature with GE Wash Buffer 1(Agilent) and 5 minutes with 37藲C Wash Buffer 2 (Agilent)	and finally in acetonitrile 1 minute at room temperature (no stabilization and drying solution should be used). Protocol: miRNA Microarray System with miRNA Complete Labeling and Hyb Kit Version 2.0 (Agilent	USA). P/N G4170-90011.	Slides were scanned immediately after washing on the Agilent DNA Microarray Scanner (G2505B). Scan Area 61x21.6 mm	Scan resolution 5um	single pass. Dye channel is set to Green and with XDR Hi 100% and XDR Lo 5%.	The cell lines were maintained in RPMI 1640 (Invitrogen	Carsbad	CA	USA) supplemented with 10% fetal calf serum	2 mM L-glutamine (Invitrogen) and 1% Penicillin/Streptomycin (Invitrogen) under standard conditions.	The images were preprocessed using the Feature Extraction software package v9.5.1 (Agilent Technology) using default parameters (protocol miRNA-v1_95_May07 and Grid 019118_D_20080214). The data files were imported to Agilent GeneSpring GX10 for preprosessing and further statistical analysis. The intensity values were log2 transformed and quantile normalized.	GPL8227	Heidi	Maria	Naml酶s	heidina@rr-research.no	Department of Tumor Biology	Institute for cancer research	The Norwegian Radium Hospital
GSM702469	OS cell line_3 [Agilent]	GSM702469	Public on Oct 16 2012	Apr 06 2011	Oct 16 2012	RNA	1	Osteosarcoma cell line	Homo sapiens	cell line: HOS	total RNA	Total RNA	including small RNAs	from cell lines and bones was extracted using the Qiagen miRNeasy Mini kit (Qiagen	California	USA) according to the manufacturer's protocol. RNA purity and quantity was measured on a NanoDrop ND-1000 spectrophotometer (Nanodrop Technologies	Wilmington	Delaware	USA)	and RNA integrity was evaluated using an Agilent 2100 Bioanalyzer (Agilent Technologies Inc.	Palo Alto	CA).	Cy3	Cyanine-3 (Cy3) labeled RNA was prepared from 100 ng total RNA using the miRNA Microarray System with miRNA Complete Labeling and Hyb Kit Version 2.0 (Agilent	USA) (P/N G4170-90011) according to the manufacturer's instructions	9606	Cy3 labelled RNA was resuspended in 18 ul nuclease-free water	4.5 ul 10x GE Blocking Agent and 22.5 ul 2x Hi-RPM Hybridization Buffer following the manufacturer鈥檚 instructions. The samples were hybridized to Agilent Human miRNA Microarrays (version 2	G4470B) for 20 hours at 55藲C in a rotating Agilent hybridization oven. After hybridization	microarrays were washed 5 minutes at room temperature with GE Wash Buffer 1(Agilent) and 5 minutes with 37藲C Wash Buffer 2 (Agilent)	and finally in acetonitrile 1 minute at room temperature (no stabilization and drying solution should be used). Protocol: miRNA Microarray System with miRNA Complete Labeling and Hyb Kit Version 2.0 (Agilent	USA). P/N G4170-90011.	Slides were scanned immediately after washing on the Agilent DNA Microarray Scanner (G2505B). Scan Area 61x21.6 mm	Scan resolution 5um	single pass. Dye channel is set to Green and with XDR Hi 100% and XDR Lo 5%.	The cell lines were maintained in RPMI 1640 (Invitrogen	Carsbad	CA	USA) supplemented with 10% fetal calf serum	2 mM L-glutamine (Invitrogen) and 1% Penicillin/Streptomycin (Invitrogen) under standard conditions.	The images were preprocessed using the Feature Extraction software package v9.5.1 (Agilent Technology) using default parameters (protocol miRNA-v1_95_May07 and Grid 019118_D_20080214). The data files were imported to Agilent GeneSpring GX10 for preprosessing and further statistical analysis. The intensity values were log2 transformed and quantile normalized.	GPL8227	Heidi	Maria	Naml酶s	heidina@rr-research.no	Department of Tumor Biology	Institute for cancer research	The Norwegian Radium Hospital
GSM702470	OS cell line_4 [Agilent]	GSM702470	Public on Oct 16 2012	Apr 06 2011	Oct 16 2012	RNA	1	Osteosarcoma cell line	Homo sapiens	cell line: IOR-MOS	total RNA	Total RNA	including small RNAs	from cell lines and bones was extracted using the Qiagen miRNeasy Mini kit (Qiagen	California	USA) according to the manufacturer's protocol. RNA purity and quantity was measured on a NanoDrop ND-1000 spectrophotometer (Nanodrop Technologies	Wilmington	Delaware	USA)	and RNA integrity was evaluated using an Agilent 2100 Bioanalyzer (Agilent Technologies Inc.	Palo Alto	CA).	Cy3	Cyanine-3 (Cy3) labeled RNA was prepared from 100 ng total RNA using the miRNA Microarray System with miRNA Complete Labeling and Hyb Kit Version 2.0 (Agilent	USA) (P/N G4170-90011) according to the manufacturer's instructions	9606	Cy3 labelled RNA was resuspended in 18 ul nuclease-free water	4.5 ul 10x GE Blocking Agent and 22.5 ul 2x Hi-RPM Hybridization Buffer following the manufacturer鈥檚 instructions. The samples were hybridized to Agilent Human miRNA Microarrays (version 2	G4470B) for 20 hours at 55藲C in a rotating Agilent hybridization oven. After hybridization	microarrays were washed 5 minutes at room temperature with GE Wash Buffer 1(Agilent) and 5 minutes with 37藲C Wash Buffer 2 (Agilent)	and finally in acetonitrile 1 minute at room temperature (no stabilization and drying solution should be used). Protocol: miRNA Microarray System with miRNA Complete Labeling and Hyb Kit Version 2.0 (Agilent	USA). P/N G4170-90011.	Slides were scanned immediately after washing on the Agilent DNA Microarray Scanner (G2505B). Scan Area 61x21.6 mm	Scan resolution 5um	single pass. Dye channel is set to Green and with XDR Hi 100% and XDR Lo 5%.	The cell lines were maintained in RPMI 1640 (Invitrogen	Carsbad	CA	USA) supplemented with 10% fetal calf serum	2 mM L-glutamine (Invitrogen) and 1% Penicillin/Streptomycin (Invitrogen) under standard conditions.	The images were preprocessed using the Feature Extraction software package v9.5.1 (Agilent Technology) using default parameters (protocol miRNA-v1_95_May07 and Grid 019118_D_20080214). The data files were imported to Agilent GeneSpring GX10 for preprosessing and further statistical analysis. The intensity values were log2 transformed and quantile normalized.	GPL8227	Heidi	Maria	Naml酶s	heidina@rr-research.no	Department of Tumor Biology	Institute for cancer research	The Norwegian Radium Hospital
GSM702471	OS cell line_5 [Agilent]	GSM702471	Public on Oct 16 2012	Apr 06 2011	Oct 16 2012	RNA	1	Osteosarcoma cell line	Homo sapiens	cell line: IOR-OS10	total RNA	Total RNA	including small RNAs	from cell lines and bones was extracted using the Qiagen miRNeasy Mini kit (Qiagen	California	USA) according to the manufacturer's protocol. RNA purity and quantity was measured on a NanoDrop ND-1000 spectrophotometer (Nanodrop Technologies	Wilmington	Delaware	USA)	and RNA integrity was evaluated using an Agilent 2100 Bioanalyzer (Agilent Technologies Inc.	Palo Alto	CA).	Cy3	Cyanine-3 (Cy3) labeled RNA was prepared from 100 ng total RNA using the miRNA Microarray System with miRNA Complete Labeling and Hyb Kit Version 2.0 (Agilent	USA) (P/N G4170-90011) according to the manufacturer's instructions	9606	Cy3 labelled RNA was resuspended in 18 ul nuclease-free water	4.5 ul 10x GE Blocking Agent and 22.5 ul 2x Hi-RPM Hybridization Buffer following the manufacturer鈥檚 instructions. The samples were hybridized to Agilent Human miRNA Microarrays (version 2	G4470B) for 20 hours at 55藲C in a rotating Agilent hybridization oven. After hybridization	microarrays were washed 5 minutes at room temperature with GE Wash Buffer 1(Agilent) and 5 minutes with 37藲C Wash Buffer 2 (Agilent)	and finally in acetonitrile 1 minute at room temperature (no stabilization and drying solution should be used). Protocol: miRNA Microarray System with miRNA Complete Labeling and Hyb Kit Version 2.0 (Agilent	USA). P/N G4170-90011.	Slides were scanned immediately after washing on the Agilent DNA Microarray Scanner (G2505B). Scan Area 61x21.6 mm	Scan resolution 5um	single pass. Dye channel is set to Green and with XDR Hi 100% and XDR Lo 5%.	The cell lines were maintained in RPMI 1640 (Invitrogen	Carsbad	CA	USA) supplemented with 10% fetal calf serum	2 mM L-glutamine (Invitrogen) and 1% Penicillin/Streptomycin (Invitrogen) under standard conditions.	The images were preprocessed using the Feature Extraction software package v9.5.1 (Agilent Technology) using default parameters (protocol miRNA-v1_95_May07 and Grid 019118_D_20080214). The data files were imported to Agilent GeneSpring GX10 for preprosessing and further statistical analysis. The intensity values were log2 transformed and quantile normalized.	GPL8227	Heidi	Maria	Naml酶s	heidina@rr-research.no	Department of Tumor Biology	Institute for cancer research	The Norwegian Radium Hospital
GSM702472	OS cell line_6 [Agilent]	GSM702472	Public on Oct 16 2012	Apr 06 2011	Oct 16 2012	RNA	1	Osteosarcoma cell line	Homo sapiens	cell line: IOR-OS14	total RNA	Total RNA	including small RNAs	from cell lines and bones was extracted using the Qiagen miRNeasy Mini kit (Qiagen	California	USA) according to the manufacturer's protocol. RNA purity and quantity was measured on a NanoDrop ND-1000 spectrophotometer (Nanodrop Technologies	Wilmington	Delaware	USA)	and RNA integrity was evaluated using an Agilent 2100 Bioanalyzer (Agilent Technologies Inc.	Palo Alto	CA).	Cy3	Cyanine-3 (Cy3) labeled RNA was prepared from 100 ng total RNA using the miRNA Microarray System with miRNA Complete Labeling and Hyb Kit Version 2.0 (Agilent	USA) (P/N G4170-90011) according to the manufacturer's instructions	9606	Cy3 labelled RNA was resuspended in 18 ul nuclease-free water	4.5 ul 10x GE Blocking Agent and 22.5 ul 2x Hi-RPM Hybridization Buffer following the manufacturer鈥檚 instructions. The samples were hybridized to Agilent Human miRNA Microarrays (version 2	G4470B) for 20 hours at 55藲C in a rotating Agilent hybridization oven. After hybridization	microarrays were washed 5 minutes at room temperature with GE Wash Buffer 1(Agilent) and 5 minutes with 37藲C Wash Buffer 2 (Agilent)	and finally in acetonitrile 1 minute at room temperature (no stabilization and drying solution should be used). Protocol: miRNA Microarray System with miRNA Complete Labeling and Hyb Kit Version 2.0 (Agilent	USA). P/N G4170-90011.	Slides were scanned immediately after washing on the Agilent DNA Microarray Scanner (G2505B). Scan Area 61x21.6 mm	Scan resolution 5um	single pass. Dye channel is set to Green and with XDR Hi 100% and XDR Lo 5%.	The cell lines were maintained in RPMI 1640 (Invitrogen	Carsbad	CA	USA) supplemented with 10% fetal calf serum	2 mM L-glutamine (Invitrogen) and 1% Penicillin/Streptomycin (Invitrogen) under standard conditions.	The images were preprocessed using the Feature Extraction software package v9.5.1 (Agilent Technology) using default parameters (protocol miRNA-v1_95_May07 and Grid 019118_D_20080214). The data files were imported to Agilent GeneSpring GX10 for preprosessing and further statistical analysis. The intensity values were log2 transformed and quantile normalized.	GPL8227	Heidi	Maria	Naml酶s	heidina@rr-research.no	Department of Tumor Biology	Institute for cancer research	The Norwegian Radium Hospital
GSM702473	OS cell line_7 [Agilent]	GSM702473	Public on Oct 16 2012	Apr 06 2011	Oct 16 2012	RNA	1	Osteosarcoma cell line	Homo sapiens	cell line: IOR-OS15	total RNA	Total RNA	including small RNAs	from cell lines and bones was extracted using the Qiagen miRNeasy Mini kit (Qiagen	California	USA) according to the manufacturer's protocol. RNA purity and quantity was measured on a NanoDrop ND-1000 spectrophotometer (Nanodrop Technologies	Wilmington	Delaware	USA)	and RNA integrity was evaluated using an Agilent 2100 Bioanalyzer (Agilent Technologies Inc.	Palo Alto	CA).	Cy3	Cyanine-3 (Cy3) labeled RNA was prepared from 100 ng total RNA using the miRNA Microarray System with miRNA Complete Labeling and Hyb Kit Version 2.0 (Agilent	USA) (P/N G4170-90011) according to the manufacturer's instructions	9606	Cy3 labelled RNA was resuspended in 18 ul nuclease-free water	4.5 ul 10x GE Blocking Agent and 22.5 ul 2x Hi-RPM Hybridization Buffer following the manufacturer鈥檚 instructions. The samples were hybridized to Agilent Human miRNA Microarrays (version 2	G4470B) for 20 hours at 55藲C in a rotating Agilent hybridization oven. After hybridization	microarrays were washed 5 minutes at room temperature with GE Wash Buffer 1(Agilent) and 5 minutes with 37藲C Wash Buffer 2 (Agilent)	and finally in acetonitrile 1 minute at room temperature (no stabilization and drying solution should be used). Protocol: miRNA Microarray System with miRNA Complete Labeling and Hyb Kit Version 2.0 (Agilent	USA). P/N G4170-90011.	Slides were scanned immediately after washing on the Agilent DNA Microarray Scanner (G2505B). Scan Area 61x21.6 mm	Scan resolution 5um	single pass. Dye channel is set to Green and with XDR Hi 100% and XDR Lo 5%.	The cell lines were maintained in RPMI 1640 (Invitrogen	Carsbad	CA	USA) supplemented with 10% fetal calf serum	2 mM L-glutamine (Invitrogen) and 1% Penicillin/Streptomycin (Invitrogen) under standard conditions.	The images were preprocessed using the Feature Extraction software package v9.5.1 (Agilent Technology) using default parameters (protocol miRNA-v1_95_May07 and Grid 019118_D_20080214). The data files were imported to Agilent GeneSpring GX10 for preprosessing and further statistical analysis. The intensity values were log2 transformed and quantile normalized.	GPL8227	Heidi	Maria	Naml酶s	heidina@rr-research.no	Department of Tumor Biology	Institute for cancer research	The Norwegian Radium Hospital
GSM702474	OS cell line_8 [Agilent]	GSM702474	Public on Oct 16 2012	Apr 06 2011	Oct 16 2012	RNA	1	Osteosarcoma cell line	Homo sapiens	cell line: IOR-OS18	total RNA	Total RNA	including small RNAs	from cell lines and bones was extracted using the Qiagen miRNeasy Mini kit (Qiagen	California	USA) according to the manufacturer's protocol. RNA purity and quantity was measured on a NanoDrop ND-1000 spectrophotometer (Nanodrop Technologies	Wilmington	Delaware	USA)	and RNA integrity was evaluated using an Agilent 2100 Bioanalyzer (Agilent Technologies Inc.	Palo Alto	CA).	Cy3	Cyanine-3 (Cy3) labeled RNA was prepared from 100 ng total RNA using the miRNA Microarray System with miRNA Complete Labeling and Hyb Kit Version 2.0 (Agilent	USA) (P/N G4170-90011) according to the manufacturer's instructions	9606	Cy3 labelled RNA was resuspended in 18 ul nuclease-free water	4.5 ul 10x GE Blocking Agent and 22.5 ul 2x Hi-RPM Hybridization Buffer following the manufacturer鈥檚 instructions. The samples were hybridized to Agilent Human miRNA Microarrays (version 2	G4470B) for 20 hours at 55藲C in a rotating Agilent hybridization oven. After hybridization	microarrays were washed 5 minutes at room temperature with GE Wash Buffer 1(Agilent) and 5 minutes with 37藲C Wash Buffer 2 (Agilent)	and finally in acetonitrile 1 minute at room temperature (no stabilization and drying solution should be used). Protocol: miRNA Microarray System with miRNA Complete Labeling and Hyb Kit Version 2.0 (Agilent	USA). P/N G4170-90011.	Slides were scanned immediately after washing on the Agilent DNA Microarray Scanner (G2505B). Scan Area 61x21.6 mm	Scan resolution 5um	single pass. Dye channel is set to Green and with XDR Hi 100% and XDR Lo 5%.	The cell lines were maintained in RPMI 1640 (Invitrogen	Carsbad	CA	USA) supplemented with 10% fetal calf serum	2 mM L-glutamine (Invitrogen) and 1% Penicillin/Streptomycin (Invitrogen) under standard conditions.	The images were preprocessed using the Feature Extraction software package v9.5.1 (Agilent Technology) using default parameters (protocol miRNA-v1_95_May07 and Grid 019118_D_20080214). The data files were imported to Agilent GeneSpring GX10 for preprosessing and further statistical analysis. The intensity values were log2 transformed and quantile normalized.	GPL8227	Heidi	Maria	Naml酶s	heidina@rr-research.no	Department of Tumor Biology	Institute for cancer research	The Norwegian Radium Hospital
GSM702475	OS cell line_9 [Agilent]	GSM702475	Public on Oct 16 2012	Apr 06 2011	Oct 16 2012	RNA	1	Osteosarcoma cell line	Homo sapiens	cell line: IOR-OS9	total RNA	Total RNA	including small RNAs	from cell lines and bones was extracted using the Qiagen miRNeasy Mini kit (Qiagen	California	USA) according to the manufacturer's protocol. RNA purity and quantity was measured on a NanoDrop ND-1000 spectrophotometer (Nanodrop Technologies	Wilmington	Delaware	USA)	and RNA integrity was evaluated using an Agilent 2100 Bioanalyzer (Agilent Technologies Inc.	Palo Alto	CA).	Cy3	Cyanine-3 (Cy3) labeled RNA was prepared from 100 ng total RNA using the miRNA Microarray System with miRNA Complete Labeling and Hyb Kit Version 2.0 (Agilent	USA) (P/N G4170-90011) according to the manufacturer's instructions	9606	Cy3 labelled RNA was resuspended in 18 ul nuclease-free water	4.5 ul 10x GE Blocking Agent and 22.5 ul 2x Hi-RPM Hybridization Buffer following the manufacturer鈥檚 instructions. The samples were hybridized to Agilent Human miRNA Microarrays (version 2	G4470B) for 20 hours at 55藲C in a rotating Agilent hybridization oven. After hybridization	microarrays were washed 5 minutes at room temperature with GE Wash Buffer 1(Agilent) and 5 minutes with 37藲C Wash Buffer 2 (Agilent)	and finally in acetonitrile 1 minute at room temperature (no stabilization and drying solution should be used). Protocol: miRNA Microarray System with miRNA Complete Labeling and Hyb Kit Version 2.0 (Agilent	USA). P/N G4170-90011.	Slides were scanned immediately after washing on the Agilent DNA Microarray Scanner (G2505B). Scan Area 61x21.6 mm	Scan resolution 5um	single pass. Dye channel is set to Green and with XDR Hi 100% and XDR Lo 5%.	The cell lines were maintained in RPMI 1640 (Invitrogen	Carsbad	CA	USA) supplemented with 10% fetal calf serum	2 mM L-glutamine (Invitrogen) and 1% Penicillin/Streptomycin (Invitrogen) under standard conditions.	The images were preprocessed using the Feature Extraction software package v9.5.1 (Agilent Technology) using default parameters (protocol miRNA-v1_95_May07 and Grid 019118_D_20080214). The data files were imported to Agilent GeneSpring GX10 for preprosessing and further statistical analysis. The intensity values were log2 transformed and quantile normalized.	GPL8227	Heidi	Maria	Naml酶s	heidina@rr-research.no	Department of Tumor Biology	Institute for cancer research	The Norwegian Radium Hospital
GSM702476	OS cell line_10 [Agilent]	GSM702476	Public on Oct 16 2012	Apr 06 2011	Oct 16 2012	RNA	1	Osteosarcoma cell line	Homo sapiens	cell line: IOR-SARG	total RNA	Total RNA	including small RNAs	from cell lines and bones was extracted using the Qiagen miRNeasy Mini kit (Qiagen	California	USA) according to the manufacturer's protocol. RNA purity and quantity was measured on a NanoDrop ND-1000 spectrophotometer (Nanodrop Technologies	Wilmington	Delaware	USA)	and RNA integrity was evaluated using an Agilent 2100 Bioanalyzer (Agilent Technologies Inc.	Palo Alto	CA).	Cy3	Cyanine-3 (Cy3) labeled RNA was prepared from 100 ng total RNA using the miRNA Microarray System with miRNA Complete Labeling and Hyb Kit Version 2.0 (Agilent	USA) (P/N G4170-90011) according to the manufacturer's instructions	9606	Cy3 labelled RNA was resuspended in 18 ul nuclease-free water	4.5 ul 10x GE Blocking Agent and 22.5 ul 2x Hi-RPM Hybridization Buffer following the manufacturer鈥檚 instructions. The samples were hybridized to Agilent Human miRNA Microarrays (version 2	G4470B) for 20 hours at 55藲C in a rotating Agilent hybridization oven. After hybridization	microarrays were washed 5 minutes at room temperature with GE Wash Buffer 1(Agilent) and 5 minutes with 37藲C Wash Buffer 2 (Agilent)	and finally in acetonitrile 1 minute at room temperature (no stabilization and drying solution should be used). Protocol: miRNA Microarray System with miRNA Complete Labeling and Hyb Kit Version 2.0 (Agilent	USA). P/N G4170-90011.	Slides were scanned immediately after washing on the Agilent DNA Microarray Scanner (G2505B). Scan Area 61x21.6 mm	Scan resolution 5um	single pass. Dye channel is set to Green and with XDR Hi 100% and XDR Lo 5%.	The cell lines were maintained in RPMI 1640 (Invitrogen	Carsbad	CA	USA) supplemented with 10% fetal calf serum	2 mM L-glutamine (Invitrogen) and 1% Penicillin/Streptomycin (Invitrogen) under standard conditions.	The images were preprocessed using the Feature Extraction software package v9.5.1 (Agilent Technology) using default parameters (protocol miRNA-v1_95_May07 and Grid 019118_D_20080214). The data files were imported to Agilent GeneSpring GX10 for preprosessing and further statistical analysis. The intensity values were log2 transformed and quantile normalized.	GPL8227	Heidi	Maria	Naml酶s	heidina@rr-research.no	Department of Tumor Biology	Institute for cancer research	The Norwegian Radium Hospital
GSM702477	OS cell line_11 [Agilent]	GSM702477	Public on Oct 16 2012	Apr 06 2011	Oct 16 2012	RNA	1	Osteosarcoma cell line	Homo sapiens	cell line: KPD	total RNA	Total RNA	including small RNAs	from cell lines and bones was extracted using the Qiagen miRNeasy Mini kit (Qiagen	California	USA) according to the manufacturer's protocol. RNA purity and quantity was measured on a NanoDrop ND-1000 spectrophotometer (Nanodrop Technologies	Wilmington	Delaware	USA)	and RNA integrity was evaluated using an Agilent 2100 Bioanalyzer (Agilent Technologies Inc.	Palo Alto	CA).	Cy3	Cyanine-3 (Cy3) labeled RNA was prepared from 100 ng total RNA using the miRNA Microarray System with miRNA Complete Labeling and Hyb Kit Version 2.0 (Agilent	USA) (P/N G4170-90011) according to the manufacturer's instructions	9606	Cy3 labelled RNA was resuspended in 18 ul nuclease-free water	4.5 ul 10x GE Blocking Agent and 22.5 ul 2x Hi-RPM Hybridization Buffer following the manufacturer鈥檚 instructions. The samples were hybridized to Agilent Human miRNA Microarrays (version 2	G4470B) for 20 hours at 55藲C in a rotating Agilent hybridization oven. After hybridization	microarrays were washed 5 minutes at room temperature with GE Wash Buffer 1(Agilent) and 5 minutes with 37藲C Wash Buffer 2 (Agilent)	and finally in acetonitrile 1 minute at room temperature (no stabilization and drying solution should be used). Protocol: miRNA Microarray System with miRNA Complete Labeling and Hyb Kit Version 2.0 (Agilent	USA). P/N G4170-90011.	Slides were scanned immediately after washing on the Agilent DNA Microarray Scanner (G2505B). Scan Area 61x21.6 mm	Scan resolution 5um	single pass. Dye channel is set to Green and with XDR Hi 100% and XDR Lo 5%.	The cell lines were maintained in RPMI 1640 (Invitrogen	Carsbad	CA	USA) supplemented with 10% fetal calf serum	2 mM L-glutamine (Invitrogen) and 1% Penicillin/Streptomycin (Invitrogen) under standard conditions.	The images were preprocessed using the Feature Extraction software package v9.5.1 (Agilent Technology) using default parameters (protocol miRNA-v1_95_May07 and Grid 019118_D_20080214). The data files were imported to Agilent GeneSpring GX10 for preprosessing and further statistical analysis. The intensity values were log2 transformed and quantile normalized.	GPL8227	Heidi	Maria	Naml酶s	heidina@rr-research.no	Department of Tumor Biology	Institute for cancer research	The Norwegian Radium Hospital
GSM702478	OS cell line_12 [Agilent]	GSM702478	Public on Oct 16 2012	Apr 06 2011	Oct 16 2012	RNA	1	Osteosarcoma cell line	Homo sapiens	cell line: MG-63	total RNA	Total RNA	including small RNAs	from cell lines and bones was extracted using the Qiagen miRNeasy Mini kit (Qiagen	California	USA) according to the manufacturer's protocol. RNA purity and quantity was measured on a NanoDrop ND-1000 spectrophotometer (Nanodrop Technologies	Wilmington	Delaware	USA)	and RNA integrity was evaluated using an Agilent 2100 Bioanalyzer (Agilent Technologies Inc.	Palo Alto	CA).	Cy3	Cyanine-3 (Cy3) labeled RNA was prepared from 100 ng total RNA using the miRNA Microarray System with miRNA Complete Labeling and Hyb Kit Version 2.0 (Agilent	USA) (P/N G4170-90011) according to the manufacturer's instructions	9606	Cy3 labelled RNA was resuspended in 18 ul nuclease-free water	4.5 ul 10x GE Blocking Agent and 22.5 ul 2x Hi-RPM Hybridization Buffer following the manufacturer鈥檚 instructions. The samples were hybridized to Agilent Human miRNA Microarrays (version 2	G4470B) for 20 hours at 55藲C in a rotating Agilent hybridization oven. After hybridization	microarrays were washed 5 minutes at room temperature with GE Wash Buffer 1(Agilent) and 5 minutes with 37藲C Wash Buffer 2 (Agilent)	and finally in acetonitrile 1 minute at room temperature (no stabilization and drying solution should be used). Protocol: miRNA Microarray System with miRNA Complete Labeling and Hyb Kit Version 2.0 (Agilent	USA). P/N G4170-90011.	Slides were scanned immediately after washing on the Agilent DNA Microarray Scanner (G2505B). Scan Area 61x21.6 mm	Scan resolution 5um	single pass. Dye channel is set to Green and with XDR Hi 100% and XDR Lo 5%.	The cell lines were maintained in RPMI 1640 (Invitrogen	Carsbad	CA	USA) supplemented with 10% fetal calf serum	2 mM L-glutamine (Invitrogen) and 1% Penicillin/Streptomycin (Invitrogen) under standard conditions.	The images were preprocessed using the Feature Extraction software package v9.5.1 (Agilent Technology) using default parameters (protocol miRNA-v1_95_May07 and Grid 019118_D_20080214). The data files were imported to Agilent GeneSpring GX10 for preprosessing and further statistical analysis. The intensity values were log2 transformed and quantile normalized.	GPL8227	Heidi	Maria	Naml酶s	heidina@rr-research.no	Department of Tumor Biology	Institute for cancer research	The Norwegian Radium Hospital
GSM702479	OS cell line_13 [Agilent]	GSM702479	Public on Oct 16 2012	Apr 06 2011	Oct 16 2012	RNA	1	Osteosarcoma cell line	Homo sapiens	cell line: MHM	total RNA	Total RNA	including small RNAs	from cell lines and bones was extracted using the Qiagen miRNeasy Mini kit (Qiagen	California	USA) according to the manufacturer's protocol. RNA purity and quantity was measured on a NanoDrop ND-1000 spectrophotometer (Nanodrop Technologies	Wilmington	Delaware	USA)	and RNA integrity was evaluated using an Agilent 2100 Bioanalyzer (Agilent Technologies Inc.	Palo Alto	CA).	Cy3	Cyanine-3 (Cy3) labeled RNA was prepared from 100 ng total RNA using the miRNA Microarray System with miRNA Complete Labeling and Hyb Kit Version 2.0 (Agilent	USA) (P/N G4170-90011) according to the manufacturer's instructions	9606	Cy3 labelled RNA was resuspended in 18 ul nuclease-free water	4.5 ul 10x GE Blocking Agent and 22.5 ul 2x Hi-RPM Hybridization Buffer following the manufacturer鈥檚 instructions. The samples were hybridized to Agilent Human miRNA Microarrays (version 2	G4470B) for 20 hours at 55藲C in a rotating Agilent hybridization oven. After hybridization	microarrays were washed 5 minutes at room temperature with GE Wash Buffer 1(Agilent) and 5 minutes with 37藲C Wash Buffer 2 (Agilent)	and finally in acetonitrile 1 minute at room temperature (no stabilization and drying solution should be used). Protocol: miRNA Microarray System with miRNA Complete Labeling and Hyb Kit Version 2.0 (Agilent	USA). P/N G4170-90011.	Slides were scanned immediately after washing on the Agilent DNA Microarray Scanner (G2505B). Scan Area 61x21.6 mm	Scan resolution 5um	single pass. Dye channel is set to Green and with XDR Hi 100% and XDR Lo 5%.	The cell lines were maintained in RPMI 1640 (Invitrogen	Carsbad	CA	USA) supplemented with 10% fetal calf serum	2 mM L-glutamine (Invitrogen) and 1% Penicillin/Streptomycin (Invitrogen) under standard conditions.	The images were preprocessed using the Feature Extraction software package v9.5.1 (Agilent Technology) using default parameters (protocol miRNA-v1_95_May07 and Grid 019118_D_20080214). The data files were imported to Agilent GeneSpring GX10 for preprosessing and further statistical analysis. The intensity values were log2 transformed and quantile normalized.	GPL8227	Heidi	Maria	Naml酶s	heidina@rr-research.no	Department of Tumor Biology	Institute for cancer research	The Norwegian Radium Hospital
GSM702480	OS cell line_14 [Agilent]	GSM702480	Public on Oct 16 2012	Apr 06 2011	Oct 16 2012	RNA	1	Osteosarcoma cell line	Homo sapiens	cell line: MNNG-HOS	total RNA	Total RNA	including small RNAs	from cell lines and bones was extracted using the Qiagen miRNeasy Mini kit (Qiagen	California	USA) according to the manufacturer's protocol. RNA purity and quantity was measured on a NanoDrop ND-1000 spectrophotometer (Nanodrop Technologies	Wilmington	Delaware	USA)	and RNA integrity was evaluated using an Agilent 2100 Bioanalyzer (Agilent Technologies Inc.	Palo Alto	CA).	Cy3	Cyanine-3 (Cy3) labeled RNA was prepared from 100 ng total RNA using the miRNA Microarray System with miRNA Complete Labeling and Hyb Kit Version 2.0 (Agilent	USA) (P/N G4170-90011) according to the manufacturer's instructions	9606	Cy3 labelled RNA was resuspended in 18 ul nuclease-free water	4.5 ul 10x GE Blocking Agent and 22.5 ul 2x Hi-RPM Hybridization Buffer following the manufacturer鈥檚 instructions. The samples were hybridized to Agilent Human miRNA Microarrays (version 2	G4470B) for 20 hours at 55藲C in a rotating Agilent hybridization oven. After hybridization	microarrays were washed 5 minutes at room temperature with GE Wash Buffer 1(Agilent) and 5 minutes with 37藲C Wash Buffer 2 (Agilent)	and finally in acetonitrile 1 minute at room temperature (no stabilization and drying solution should be used). Protocol: miRNA Microarray System with miRNA Complete Labeling and Hyb Kit Version 2.0 (Agilent	USA). P/N G4170-90011.	Slides were scanned immediately after washing on the Agilent DNA Microarray Scanner (G2505B). Scan Area 61x21.6 mm	Scan resolution 5um	single pass. Dye channel is set to Green and with XDR Hi 100% and XDR Lo 5%.	The cell lines were maintained in RPMI 1640 (Invitrogen	Carsbad	CA	USA) supplemented with 10% fetal calf serum	2 mM L-glutamine (Invitrogen) and 1% Penicillin/Streptomycin (Invitrogen) under standard conditions.	The images were preprocessed using the Feature Extraction software package v9.5.1 (Agilent Technology) using default parameters (protocol miRNA-v1_95_May07 and Grid 019118_D_20080214). The data files were imported to Agilent GeneSpring GX10 for preprosessing and further statistical analysis. The intensity values were log2 transformed and quantile normalized.	GPL8227	Heidi	Maria	Naml酶s	heidina@rr-research.no	Department of Tumor Biology	Institute for cancer research	The Norwegian Radium Hospital
GSM702481	OS cell line_15 [Agilent]	GSM702481	Public on Oct 16 2012	Apr 06 2011	Oct 16 2012	RNA	1	Osteosarcoma cell line	Homo sapiens	cell line: OHS	total RNA	Total RNA	including small RNAs	from cell lines and bones was extracted using the Qiagen miRNeasy Mini kit (Qiagen	California	USA) according to the manufacturer's protocol. RNA purity and quantity was measured on a NanoDrop ND-1000 spectrophotometer (Nanodrop Technologies	Wilmington	Delaware	USA)	and RNA integrity was evaluated using an Agilent 2100 Bioanalyzer (Agilent Technologies Inc.	Palo Alto	CA).	Cy3	Cyanine-3 (Cy3) labeled RNA was prepared from 100 ng total RNA using the miRNA Microarray System with miRNA Complete Labeling and Hyb Kit Version 2.0 (Agilent	USA) (P/N G4170-90011) according to the manufacturer's instructions	9606	Cy3 labelled RNA was resuspended in 18 ul nuclease-free water	4.5 ul 10x GE Blocking Agent and 22.5 ul 2x Hi-RPM Hybridization Buffer following the manufacturer鈥檚 instructions. The samples were hybridized to Agilent Human miRNA Microarrays (version 2	G4470B) for 20 hours at 55藲C in a rotating Agilent hybridization oven. After hybridization	microarrays were washed 5 minutes at room temperature with GE Wash Buffer 1(Agilent) and 5 minutes with 37藲C Wash Buffer 2 (Agilent)	and finally in acetonitrile 1 minute at room temperature (no stabilization and drying solution should be used). Protocol: miRNA Microarray System with miRNA Complete Labeling and Hyb Kit Version 2.0 (Agilent	USA). P/N G4170-90011.	Slides were scanned immediately after washing on the Agilent DNA Microarray Scanner (G2505B). Scan Area 61x21.6 mm	Scan resolution 5um	single pass. Dye channel is set to Green and with XDR Hi 100% and XDR Lo 5%.	The cell lines were maintained in RPMI 1640 (Invitrogen	Carsbad	CA	USA) supplemented with 10% fetal calf serum	2 mM L-glutamine (Invitrogen) and 1% Penicillin/Streptomycin (Invitrogen) under standard conditions.	The images were preprocessed using the Feature Extraction software package v9.5.1 (Agilent Technology) using default parameters (protocol miRNA-v1_95_May07 and Grid 019118_D_20080214). The data files were imported to Agilent GeneSpring GX10 for preprosessing and further statistical analysis. The intensity values were log2 transformed and quantile normalized.	GPL8227	Heidi	Maria	Naml酶s	heidina@rr-research.no	Department of Tumor Biology	Institute for cancer research	The Norwegian Radium Hospital
GSM702482	OS cell line_16 [Agilent]	GSM702482	Public on Oct 16 2012	Apr 06 2011	Oct 16 2012	RNA	1	Osteosarcoma cell line	Homo sapiens	cell line: OSA	total RNA	Total RNA	including small RNAs	from cell lines and bones was extracted using the Qiagen miRNeasy Mini kit (Qiagen	California	USA) according to the manufacturer's protocol. RNA purity and quantity was measured on a NanoDrop ND-1000 spectrophotometer (Nanodrop Technologies	Wilmington	Delaware	USA)	and RNA integrity was evaluated using an Agilent 2100 Bioanalyzer (Agilent Technologies Inc.	Palo Alto	CA).	Cy3	Cyanine-3 (Cy3) labeled RNA was prepared from 100 ng total RNA using the miRNA Microarray System with miRNA Complete Labeling and Hyb Kit Version 2.0 (Agilent	USA) (P/N G4170-90011) according to the manufacturer's instructions	9606	Cy3 labelled RNA was resuspended in 18 ul nuclease-free water	4.5 ul 10x GE Blocking Agent and 22.5 ul 2x Hi-RPM Hybridization Buffer following the manufacturer鈥檚 instructions. The samples were hybridized to Agilent Human miRNA Microarrays (version 2	G4470B) for 20 hours at 55藲C in a rotating Agilent hybridization oven. After hybridization	microarrays were washed 5 minutes at room temperature with GE Wash Buffer 1(Agilent) and 5 minutes with 37藲C Wash Buffer 2 (Agilent)	and finally in acetonitrile 1 minute at room temperature (no stabilization and drying solution should be used). Protocol: miRNA Microarray System with miRNA Complete Labeling and Hyb Kit Version 2.0 (Agilent	USA). P/N G4170-90011.	Slides were scanned immediately after washing on the Agilent DNA Microarray Scanner (G2505B). Scan Area 61x21.6 mm	Scan resolution 5um	single pass. Dye channel is set to Green and with XDR Hi 100% and XDR Lo 5%.	The cell lines were maintained in RPMI 1640 (Invitrogen	Carsbad	CA	USA) supplemented with 10% fetal calf serum	2 mM L-glutamine (Invitrogen) and 1% Penicillin/Streptomycin (Invitrogen) under standard conditions.	The images were preprocessed using the Feature Extraction software package v9.5.1 (Agilent Technology) using default parameters (protocol miRNA-v1_95_May07 and Grid 019118_D_20080214). The data files were imported to Agilent GeneSpring GX10 for preprosessing and further statistical analysis. The intensity values were log2 transformed and quantile normalized.	GPL8227	Heidi	Maria	Naml酶s	heidina@rr-research.no	Department of Tumor Biology	Institute for cancer research	The Norwegian Radium Hospital
GSM702483	OS cell line_17 [Agilent]	GSM702483	Public on Oct 16 2012	Apr 06 2011	Oct 16 2012	RNA	1	Osteosarcoma cell line	Homo sapiens	cell line: Saos-2	total RNA	Total RNA	including small RNAs	from cell lines and bones was extracted using the Qiagen miRNeasy Mini kit (Qiagen	California	USA) according to the manufacturer's protocol. RNA purity and quantity was measured on a NanoDrop ND-1000 spectrophotometer (Nanodrop Technologies	Wilmington	Delaware	USA)	and RNA integrity was evaluated using an Agilent 2100 Bioanalyzer (Agilent Technologies Inc.	Palo Alto	CA).	Cy3	Cyanine-3 (Cy3) labeled RNA was prepared from 100 ng total RNA using the miRNA Microarray System with miRNA Complete Labeling and Hyb Kit Version 2.0 (Agilent	USA) (P/N G4170-90011) according to the manufacturer's instructions	9606	Cy3 labelled RNA was resuspended in 18 ul nuclease-free water	4.5 ul 10x GE Blocking Agent and 22.5 ul 2x Hi-RPM Hybridization Buffer following the manufacturer鈥檚 instructions. The samples were hybridized to Agilent Human miRNA Microarrays (version 2	G4470B) for 20 hours at 55藲C in a rotating Agilent hybridization oven. After hybridization	microarrays were washed 5 minutes at room temperature with GE Wash Buffer 1(Agilent) and 5 minutes with 37藲C Wash Buffer 2 (Agilent)	and finally in acetonitrile 1 minute at room temperature (no stabilization and drying solution should be used). Protocol: miRNA Microarray System with miRNA Complete Labeling and Hyb Kit Version 2.0 (Agilent	USA). P/N G4170-90011.	Slides were scanned immediately after washing on the Agilent DNA Microarray Scanner (G2505B). Scan Area 61x21.6 mm	Scan resolution 5um	single pass. Dye channel is set to Green and with XDR Hi 100% and XDR Lo 5%.	The cell lines were maintained in RPMI 1640 (Invitrogen	Carsbad	CA	USA) supplemented with 10% fetal calf serum	2 mM L-glutamine (Invitrogen) and 1% Penicillin/Streptomycin (Invitrogen) under standard conditions.	The images were preprocessed using the Feature Extraction software package v9.5.1 (Agilent Technology) using default parameters (protocol miRNA-v1_95_May07 and Grid 019118_D_20080214). The data files were imported to Agilent GeneSpring GX10 for preprosessing and further statistical analysis. The intensity values were log2 transformed and quantile normalized.	GPL8227	Heidi	Maria	Naml酶s	heidina@rr-research.no	Department of Tumor Biology	Institute for cancer research	The Norwegian Radium Hospital
GSM702484	OS cell line_18 [Agilent]	GSM702484	Public on Oct 16 2012	Apr 06 2011	Oct 16 2012	RNA	1	Osteosarcoma cell line	Homo sapiens	cell line: U-2 OS	total RNA	Total RNA	including small RNAs	from cell lines and bones was extracted using the Qiagen miRNeasy Mini kit (Qiagen	California	USA) according to the manufacturer's protocol. RNA purity and quantity was measured on a NanoDrop ND-1000 spectrophotometer (Nanodrop Technologies	Wilmington	Delaware	USA)	and RNA integrity was evaluated using an Agilent 2100 Bioanalyzer (Agilent Technologies Inc.	Palo Alto	CA).	Cy3	Cyanine-3 (Cy3) labeled RNA was prepared from 100 ng total RNA using the miRNA Microarray System with miRNA Complete Labeling and Hyb Kit Version 2.0 (Agilent	USA) (P/N G4170-90011) according to the manufacturer's instructions	9606	Cy3 labelled RNA was resuspended in 18 ul nuclease-free water	4.5 ul 10x GE Blocking Agent and 22.5 ul 2x Hi-RPM Hybridization Buffer following the manufacturer鈥檚 instructions. The samples were hybridized to Agilent Human miRNA Microarrays (version 2	G4470B) for 20 hours at 55藲C in a rotating Agilent hybridization oven. After hybridization	microarrays were washed 5 minutes at room temperature with GE Wash Buffer 1(Agilent) and 5 minutes with 37藲C Wash Buffer 2 (Agilent)	and finally in acetonitrile 1 minute at room temperature (no stabilization and drying solution should be used). Protocol: miRNA Microarray System with miRNA Complete Labeling and Hyb Kit Version 2.0 (Agilent	USA). P/N G4170-90011.	Slides were scanned immediately after washing on the Agilent DNA Microarray Scanner (G2505B). Scan Area 61x21.6 mm	Scan resolution 5um	single pass. Dye channel is set to Green and with XDR Hi 100% and XDR Lo 5%.	The cell lines were maintained in RPMI 1640 (Invitrogen	Carsbad	CA	USA) supplemented with 10% fetal calf serum	2 mM L-glutamine (Invitrogen) and 1% Penicillin/Streptomycin (Invitrogen) under standard conditions.	The images were preprocessed using the Feature Extraction software package v9.5.1 (Agilent Technology) using default parameters (protocol miRNA-v1_95_May07 and Grid 019118_D_20080214). The data files were imported to Agilent GeneSpring GX10 for preprosessing and further statistical analysis. The intensity values were log2 transformed and quantile normalized.	GPL8227	Heidi	Maria	Naml酶s	heidina@rr-research.no	Department of Tumor Biology	Institute for cancer research	The Norwegian Radium Hospital
GSM702485	OS cell line_19 [Agilent]	GSM702485	Public on Oct 16 2012	Apr 06 2011	Oct 16 2012	RNA	1	Osteosarcoma cell line	Homo sapiens	cell line: ZK-58	total RNA	Total RNA	including small RNAs	from cell lines and bones was extracted using the Qiagen miRNeasy Mini kit (Qiagen	California	USA) according to the manufacturer's protocol. RNA purity and quantity was measured on a NanoDrop ND-1000 spectrophotometer (Nanodrop Technologies	Wilmington	Delaware	USA)	and RNA integrity was evaluated using an Agilent 2100 Bioanalyzer (Agilent Technologies Inc.	Palo Alto	CA).	Cy3	Cyanine-3 (Cy3) labeled RNA was prepared from 100 ng total RNA using the miRNA Microarray System with miRNA Complete Labeling and Hyb Kit Version 2.0 (Agilent	USA) (P/N G4170-90011) according to the manufacturer's instructions	9606	Cy3 labelled RNA was resuspended in 18 ul nuclease-free water	4.5 ul 10x GE Blocking Agent and 22.5 ul 2x Hi-RPM Hybridization Buffer following the manufacturer鈥檚 instructions. The samples were hybridized to Agilent Human miRNA Microarrays (version 2	G4470B) for 20 hours at 55藲C in a rotating Agilent hybridization oven. After hybridization	microarrays were washed 5 minutes at room temperature with GE Wash Buffer 1(Agilent) and 5 minutes with 37藲C Wash Buffer 2 (Agilent)	and finally in acetonitrile 1 minute at room temperature (no stabilization and drying solution should be used). Protocol: miRNA Microarray System with miRNA Complete Labeling and Hyb Kit Version 2.0 (Agilent	USA). P/N G4170-90011.	Slides were scanned immediately after washing on the Agilent DNA Microarray Scanner (G2505B). Scan Area 61x21.6 mm	Scan resolution 5um	single pass. Dye channel is set to Green and with XDR Hi 100% and XDR Lo 5%.	The cell lines were maintained in RPMI 1640 (Invitrogen	Carsbad	CA	USA) supplemented with 10% fetal calf serum	2 mM L-glutamine (Invitrogen) and 1% Penicillin/Streptomycin (Invitrogen) under standard conditions.	The images were preprocessed using the Feature Extraction software package v9.5.1 (Agilent Technology) using default parameters (protocol miRNA-v1_95_May07 and Grid 019118_D_20080214). The data files were imported to Agilent GeneSpring GX10 for preprosessing and further statistical analysis. The intensity values were log2 transformed and quantile normalized.	GPL8227	Heidi	Maria	Naml酶s	heidina@rr-research.no	Department of Tumor Biology	Institute for cancer research	The Norwegian Radium Hospital
GSM702486	Human Bone_1 [Agilent]	GSM702486	Public on Oct 16 2012	Apr 06 2011	Oct 16 2012	RNA	1	Normal Bone	Homo sapiens	tissue: Normal bone	total RNA	Total RNA	including small RNAs	from cell lines and bones was extracted using the Qiagen miRNeasy Mini kit (Qiagen	California	USA) according to the manufacturer's protocol. RNA purity and quantity was measured on a NanoDrop ND-1000 spectrophotometer (Nanodrop Technologies	Wilmington	Delaware	USA)	and RNA integrity was evaluated using an Agilent 2100 Bioanalyzer (Agilent Technologies Inc.	Palo Alto	CA).	Cy3	Cyanine-3 (Cy3) labeled RNA was prepared from 100 ng total RNA using the miRNA Microarray System with miRNA Complete Labeling and Hyb Kit Version 2.0 (Agilent	USA) (P/N G4170-90011) according to the manufacturer's instructions	9606	Cy3 labelled RNA was resuspended in 18 ul nuclease-free water	4.5 ul 10x GE Blocking Agent and 22.5 ul 2x Hi-RPM Hybridization Buffer following the manufacturer鈥檚 instructions. The samples were hybridized to Agilent Human miRNA Microarrays (version 2	G4470B) for 20 hours at 55藲C in a rotating Agilent hybridization oven. After hybridization	microarrays were washed 5 minutes at room temperature with GE Wash Buffer 1(Agilent) and 5 minutes with 37藲C Wash Buffer 2 (Agilent)	and finally in acetonitrile 1 minute at room temperature (no stabilization and drying solution should be used). Protocol: miRNA Microarray System with miRNA Complete Labeling and Hyb Kit Version 2.0 (Agilent	USA). P/N G4170-90011.	Slides were scanned immediately after washing on the Agilent DNA Microarray Scanner (G2505B). Scan Area 61x21.6 mm	Scan resolution 5um	single pass. Dye channel is set to Green and with XDR Hi 100% and XDR Lo 5%.	Two long bone samples were obtained from amputations of patients without osteosarcoma at the Norwegian Radium Hospital	The images were preprocessed using the Feature Extraction software package v9.5.1 (Agilent Technology) using default parameters (protocol miRNA-v1_95_May07 and Grid 019118_D_20080214). The data files were imported to Agilent GeneSpring GX10 for preprosessing and further statistical analysis. The intensity values were log2 transformed and quantile normalized.	GPL8227	Heidi	Maria	Naml酶s	heidina@rr-research.no	Department of Tumor Biology	Institute for cancer research	The Norwegian Radium Hospital	Oslo University Hospital	PO Box 4953 Nydalen	Oslo	424
GSM702487	Human Bone_2 [Agilent]	GSM702487	Public on Oct 16 2012	Apr 06 2011	Oct 16 2012	RNA	1	Normal Bone	Homo sapiens	tissue: Normal bone	total RNA	Total RNA	including small RNAs	from cell lines and bones was extracted using the Qiagen miRNeasy Mini kit (Qiagen	California	USA) according to the manufacturer's protocol. RNA purity and quantity was measured on a NanoDrop ND-1000 spectrophotometer (Nanodrop Technologies	Wilmington	Delaware	USA)	and RNA integrity was evaluated using an Agilent 2100 Bioanalyzer (Agilent Technologies Inc.	Palo Alto	CA).	Cy3	Cyanine-3 (Cy3) labeled RNA was prepared from 100 ng total RNA using the miRNA Microarray System with miRNA Complete Labeling and Hyb Kit Version 2.0 (Agilent	USA) (P/N G4170-90011) according to the manufacturer's instructions	9606	Cy3 labelled RNA was resuspended in 18 ul nuclease-free water	4.5 ul 10x GE Blocking Agent and 22.5 ul 2x Hi-RPM Hybridization Buffer following the manufacturer鈥檚 instructions. The samples were hybridized to Agilent Human miRNA Microarrays (version 2	G4470B) for 20 hours at 55藲C in a rotating Agilent hybridization oven. After hybridization	microarrays were washed 5 minutes at room temperature with GE Wash Buffer 1(Agilent) and 5 minutes with 37藲C Wash Buffer 2 (Agilent)	and finally in acetonitrile 1 minute at room temperature (no stabilization and drying solution should be used). Protocol: miRNA Microarray System with miRNA Complete Labeling and Hyb Kit Version 2.0 (Agilent	USA). P/N G4170-90011.	Slides were scanned immediately after washing on the Agilent DNA Microarray Scanner (G2505B). Scan Area 61x21.6 mm	Scan resolution 5um	single pass. Dye channel is set to Green and with XDR Hi 100% and XDR Lo 5%.	Two long bone samples were obtained from amputations of patients without osteosarcoma at the Norwegian Radium Hospital	The images were preprocessed using the Feature Extraction software package v9.5.1 (Agilent Technology) using default parameters (protocol miRNA-v1_95_May07 and Grid 019118_D_20080214). The data files were imported to Agilent GeneSpring GX10 for preprosessing and further statistical analysis. The intensity values were log2 transformed and quantile normalized.	GPL8227	Heidi	Maria	Naml酶s	heidina@rr-research.no	Department of Tumor Biology	Institute for cancer research	The Norwegian Radium Hospital	Oslo University Hospital	PO Box 4953 Nydalen	Oslo	424
GSM702488	Human Bone_3 [Agilent]	GSM702488	Public on Oct 16 2012	Apr 06 2011	Oct 16 2012	RNA	1	Normal Bone	Homo sapiens	tissue: Normal bone	total RNA	Total RNA	including small RNAs	from cell lines and bones was extracted using the Qiagen miRNeasy Mini kit (Qiagen	California	USA) according to the manufacturer's protocol. RNA purity and quantity was measured on a NanoDrop ND-1000 spectrophotometer (Nanodrop Technologies	Wilmington	Delaware	USA)	and RNA integrity was evaluated using an Agilent 2100 Bioanalyzer (Agilent Technologies Inc.	Palo Alto	CA).	Cy3	Cyanine-3 (Cy3) labeled RNA was prepared from 100 ng total RNA using the miRNA Microarray System with miRNA Complete Labeling and Hyb Kit Version 2.0 (Agilent	USA) (P/N G4170-90011) according to the manufacturer's instructions	9606	Cy3 labelled RNA was resuspended in 18 ul nuclease-free water	4.5 ul 10x GE Blocking Agent and 22.5 ul 2x Hi-RPM Hybridization Buffer following the manufacturer鈥檚 instructions. The samples were hybridized to Agilent Human miRNA Microarrays (version 2	G4470B) for 20 hours at 55藲C in a rotating Agilent hybridization oven. After hybridization	microarrays were washed 5 minutes at room temperature with GE Wash Buffer 1(Agilent) and 5 minutes with 37藲C Wash Buffer 2 (Agilent)	and finally in acetonitrile 1 minute at room temperature (no stabilization and drying solution should be used). Protocol: miRNA Microarray System with miRNA Complete Labeling and Hyb Kit Version 2.0 (Agilent	USA). P/N G4170-90011.	Slides were scanned immediately after washing on the Agilent DNA Microarray Scanner (G2505B). Scan Area 61x21.6 mm	Scan resolution 5um	single pass. Dye channel is set to Green and with XDR Hi 100% and XDR Lo 5%.	Two normal bone samples from different donors were purchased from Capital Biosciences (Gaithersburg	MD	USA).	The images were preprocessed using the Feature Extraction software package v9.5.1 (Agilent Technology) using default parameters (protocol miRNA-v1_95_May07 and Grid 019118_D_20080214). The data files were imported to Agilent GeneSpring GX10 for preprosessing and further statistical analysis. The intensity values were log2 transformed and quantile normalized.	GPL8227	Heidi	Maria	Naml酶s	heidina@rr-research.no	Department of Tumor Biology	Institute for cancer research	The Norwegian Radium Hospital	Oslo University Hospital	PO Box 4953 Nydalen
GSM702489	Human Bone_4 [Agilent]	GSM702489	Public on Oct 16 2012	Apr 06 2011	Oct 16 2012	RNA	1	Normal Bone	Homo sapiens	tissue: Normal bone	total RNA	Total RNA	including small RNAs	from cell lines and bones was extracted using the Qiagen miRNeasy Mini kit (Qiagen	California	USA) according to the manufacturer's protocol. RNA purity and quantity was measured on a NanoDrop ND-1000 spectrophotometer (Nanodrop Technologies	Wilmington	Delaware	USA)	and RNA integrity was evaluated using an Agilent 2100 Bioanalyzer (Agilent Technologies Inc.	Palo Alto	CA).	Cy3	Cyanine-3 (Cy3) labeled RNA was prepared from 100 ng total RNA using the miRNA Microarray System with miRNA Complete Labeling and Hyb Kit Version 2.0 (Agilent	USA) (P/N G4170-90011) according to the manufacturer's instructions	9606	Cy3 labelled RNA was resuspended in 18 ul nuclease-free water	4.5 ul 10x GE Blocking Agent and 22.5 ul 2x Hi-RPM Hybridization Buffer following the manufacturer鈥檚 instructions. The samples were hybridized to Agilent Human miRNA Microarrays (version 2	G4470B) for 20 hours at 55藲C in a rotating Agilent hybridization oven. After hybridization	microarrays were washed 5 minutes at room temperature with GE Wash Buffer 1(Agilent) and 5 minutes with 37藲C Wash Buffer 2 (Agilent)	and finally in acetonitrile 1 minute at room temperature (no stabilization and drying solution should be used). Protocol: miRNA Microarray System with miRNA Complete Labeling and Hyb Kit Version 2.0 (Agilent	USA). P/N G4170-90011.	Slides were scanned immediately after washing on the Agilent DNA Microarray Scanner (G2505B). Scan Area 61x21.6 mm	Scan resolution 5um	single pass. Dye channel is set to Green and with XDR Hi 100% and XDR Lo 5%.	Two normal bone samples from different donors were purchased from Capital Biosciences (Gaithersburg	MD	USA).	The images were preprocessed using the Feature Extraction software package v9.5.1 (Agilent Technology) using default parameters (protocol miRNA-v1_95_May07 and Grid 019118_D_20080214). The data files were imported to Agilent GeneSpring GX10 for preprosessing and further statistical analysis. The intensity values were log2 transformed and quantile normalized.	GPL8227	Heidi	Maria	Naml酶s	heidina@rr-research.no	Department of Tumor Biology	Institute for cancer research	The Norwegian Radium Hospital	Oslo University Hospital	PO Box 4953 Nydalen
[truncated: 9 more columns]

## Sheet: GSE12865
Samples	title	geo_accession	status	submission_date	last_update_date	type	channel_count	source_name_ch1	organism_ch1	characteristics_ch1	treatment_protocol_ch1	growth_protocol_ch1	molecule_ch1	extract_protocol_ch1	label_ch1	label_protocol_ch1	taxid_ch1	hyb_protocol	scan_protocol	description	data_processing	platform_id	contact_name	contact_email	contact_institute	contact_address	contact_city	contact_state	contact_zip/postal_code	contact_country	supplementary_file	supplementary_file.1	data_row_count	tissue:ch1
GSM288005	HOB replicate 1	GSM288005	Public on Sep 08 2009	May 12 2008	Sep 08 2009	RNA	1	normal human osteoblasts	Homo sapiens	Normal Human Osteoblast Cells from healthy male donor (Heidelberg	Germany	Catalogue # C-12760)	Cells were harvested with Tripsin (Invitrogen) as per manifacturers instructions	The human OS cell lines U2OS (ATCC # HTB-96) and MG63 (ATCC # CRL-1427) were purchased from American Type Culture Collection ATCC (Rockville	MD) and maintained in alpha-Minimum Essential Medium (alpha-MEM) supplemented with 10% heat inactivated Fetal Bovine Serum and 2 mM L-Glutamine. Normal human osteoblasts (HOB) are primary osteoblasts from the hip bone of a normal male donor that were purchased from PromoCell (Heidelberg	Germany	Catalogue # C-12760) and maintained in medium provided by the manufacturer and used at culture passage 3. Three days after plating (~80% confluent)	cells where harvested for DNA or RNA extractions.	total RNA	Total RNA from U2OS	MG63 cells and HOB was extracted using the TRIzol reagent method. Cells were washed 3 times by Phosphate Buffer Saline (PBS) and lysed in the culture vessel using TRizol (Invitrogen	Osaka	Japan). 1 ml of TRIzol was used for every 100 mm culture plates an RNase free environment. Chloroform was then added (200 碌l for each 1 ml TRIzol) and the samples were centrifuged at high speed for 15 minutes at 4飩癈. The aqueous layer was then transferred into a new tube and RNA was precipitated with iso-propanol followed by one wash using 70% ethanol. The RNA precipitate was then dissolved in 10…	TdT labeling kit	Labeling	hybridization and scanning were performed as per Affymetrix GeneChip庐 Whole Transcript (WT) Sense Target Labeling Assay Manual version 4 (P/N 701880 Rev 4). (http://www.affymetrix.com/support/technical/byproduct.affx?product=hugene-1_0-st-v1).	9606	Labeling	hybridization and scanning were performed as per Affymetrix GeneChip庐 Whole Transcript (WT) Sense Target Labeling Assay Manual version 4 (P/N 701880 Rev 4). (http://www.affymetrix.com/support/technical/byproduct.affx?product=hugene-1_0-st-v1).	Labeling	hybridization and scanning were performed as per Affymetrix GeneChip庐 Whole Transcript (WT) Sense Target Labeling Assay Manual version 4 (P/N 701880 Rev 4). (http://www.affymetrix.com/support/technical/byproduct.affx?product=hugene-1_0-st-v1).	gene expression data from HOB bioreplicate 1	Data from RNA expression array experiments in the form of .cel files (GCOS 1.3 software) were imported into and analysed using the Partek Genomic Suite Software (PGS). The expression array .cel files for HOB	U2OS	and MG63 (2 arrays each) were imported using PGS Gene Expression Workflow tool (subject to RMA normalization and log2 transformation). The significantly over- and under-expressed genes in U2OS and in MG63 cell lines compared to HOB were detected using 1-way ANOVA tool at p<0.01 and +/- 2-fold enrichment. Significantly over- and under-expressed regions were annotated to the corresponding genes pre…	GPL6244	Bekim		Sadikovic	bsadikov@gmail.com	The SickKids Hospital and Princess Margaret Hospital	555 University Avenue	Toronto	Ontario	M5G 1X8	Canada	ftp://ftp.ncbi.nlm.nih.gov/geo/samples/GSM288nnn/GSM288005/suppl/GSM288005.CEL.gz	ftp://ftp.ncbi.nlm.nih.gov/geo/samples/GSM288nnn/GSM288005/suppl/GSM288005.chp.gz	33297
GSM288006	HOB replicate 2	GSM288006	Public on Sep 08 2009	May 12 2008	Sep 08 2009	RNA	1	normal human osteoblasts	Homo sapiens	Normal Human Osteoblast Cells from healthy male donor (Heidelberg	Germany	Catalogue # C-12760)	Cells were harvested with Tripsin (Invitrogen) as per manifacturers instructions	The human OS cell lines U2OS (ATCC # HTB-96) and MG63 (ATCC # CRL-1427) were purchased from American Type Culture Collection ATCC (Rockville	MD) and maintained in alpha-Minimum Essential Medium (alpha-MEM) supplemented with 10% heat inactivated Fetal Bovine Serum and 2 mM L-Glutamine. Normal human osteoblasts (HOB) are primary osteoblasts from the hip bone of a normal male donor that were purchased from PromoCell (Heidelberg	Germany	Catalogue # C-12760) and maintained in medium provided by the manufacturer and used at culture passage 3. Three days after plating (~80% confluent)	cells where harvested for DNA or RNA extractions.	total RNA	Total RNA from U2OS	MG63 cells and HOB was extracted using the TRIzol reagent method. Cells were washed 3 times by Phosphate Buffer Saline (PBS) and lysed in the culture vessel using TRizol (Invitrogen	Osaka	Japan). 1 ml of TRIzol was used for every 100 mm culture plates an RNase free environment. Chloroform was then added (200 碌l for each 1 ml TRIzol) and the samples were centrifuged at high speed for 15 minutes at 4飩癈. The aqueous layer was then transferred into a new tube and RNA was precipitated with iso-propanol followed by one wash using 70% ethanol. The RNA precipitate was then dissolved in 10…	TdT labeling kit	Labeling	hybridization and scanning were performed as per Affymetrix GeneChip庐 Whole Transcript (WT) Sense Target Labeling Assay Manual version 4 (P/N 701880 Rev 4). (http://www.affymetrix.com/support/technical/byproduct.affx?product=hugene-1_0-st-v1).	9606	Labeling	hybridization and scanning were performed as per Affymetrix GeneChip庐 Whole Transcript (WT) Sense Target Labeling Assay Manual version 4 (P/N 701880 Rev 4). (http://www.affymetrix.com/support/technical/byproduct.affx?product=hugene-1_0-st-v1).	Labeling	hybridization and scanning were performed as per Affymetrix GeneChip庐 Whole Transcript (WT) Sense Target Labeling Assay Manual version 4 (P/N 701880 Rev 4). (http://www.affymetrix.com/support/technical/byproduct.affx?product=hugene-1_0-st-v1).	gene expression data from HOB bioreplicate 2	Data from RNA expression array experiments in the form of .cel files (GCOS 1.3 software) were imported into and analysed using the Partek Genomic Suite Software (PGS). The expression array .cel files for HOB	U2OS	and MG63 (2 arrays each) were imported using PGS Gene Expression Workflow tool (subject to RMA normalization and log2 transformation). The significantly over- and under-expressed genes in U2OS and in MG63 cell lines compared to HOB were detected using 1-way ANOVA tool at p<0.01 and +/- 2-fold enrichment. Significantly over- and under-expressed regions were annotated to the corresponding genes pre…	GPL6244	Bekim		Sadikovic	bsadikov@gmail.com	The SickKids Hospital and Princess Margaret Hospital	555 University Avenue	Toronto	Ontario	M5G 1X8	Canada	ftp://ftp.ncbi.nlm.nih.gov/geo/samples/GSM288nnn/GSM288006/suppl/GSM288006.CEL.gz	ftp://ftp.ncbi.nlm.nih.gov/geo/samples/GSM288nnn/GSM288006/suppl/GSM288006.chp.gz	33297
GSM322691	177 replicate 1	GSM322691	Public on Sep 08 2009	Sep 19 2008	Aug 10 2012	RNA	1	osteosarcoma tumor 177	Homo sapiens	tissue: pediatric osteosarcoma	Cells were harvested with Tripsin (Invitrogen) as per manifacturers instructions	Normal human osteoblasts (HOB) are primary osteoblasts from the hip bone of a normal male donor that were purchased from PromoCell (Heidelberg	Germany	Catalogue # C-12760) and maintained in medium provided by the manufacturer and used at culture passage 3. Three days after plating (~80% confluent)	cells where harvested for DNA or RNA extractions.	total RNA	Total RNA from tumours cells and HOB was extracted using the TRIzol reagent method as per manifacturers instructions (Invitrogen	Osaka	Japan).	TdT labeling kit	Labeling	hybridization and scanning were performed as per Affymetrix GeneChip庐 Whole Transcript (WT) Sense Target Labeling Assay Manual version 4 (P/N 701880 Rev 4). (http://www.affymetrix.com/support/technical/byproduct.affx?product=hugene-1_0-st-v1).	9606	Labeling	hybridization and scanning were performed as per Affymetrix GeneChip庐 Whole Transcript (WT) Sense Target Labeling Assay Manual version 4 (P/N 701880 Rev 4). (http://www.affymetrix.com/support/technical/byproduct.affx?product=hugene-1_0-st-v1).	Labeling	hybridization and scanning were performed as per Affymetrix GeneChip庐 Whole Transcript (WT) Sense Target Labeling Assay Manual version 4 (P/N 701880 Rev 4). (http://www.affymetrix.com/support/technical/byproduct.affx?product=hugene-1_0-st-v1).	gene expression data 177 bioreplicate 1	Data from RNA expression array experiments in the form of .cel files (GCOS 1.3 software) were imported into and analysed using the Partek Genomic Suite Software (PGS). The expression array .cel files for osteoblasts and tumour samples (2 arrays each) were imported using PGS Gene Expression Workflow tool (subject to RMA normalization and log2 transformation). The significantly over- and under-expr…	either specifically for each tumour sample or cumulatively (i.e. mean signal of all tumours vs. osteoblasts). Significantly over- and under-expressed regions were annotated to the corresponding genes present on the Affymetrix Gene 1.0 Array using the HuGene-1_0-st-v1.na24.hg18.transcript.csv file.	GPL6244	Bekim		Sadikovic	bsadikov@gmail.com	The SickKids Hospital and Princess Margaret Hospital	555 University Avenue	Toronto	Ontario	M5G 1X8	Canada	ftp://ftp.ncbi.nlm.nih.gov/geo/samples/GSM322nnn/GSM322691/suppl/GSM322691.CEL.gz	ftp://ftp.ncbi.nlm.nih.gov/geo/samples/GSM322nnn/GSM322691/suppl/GSM322691.chp.gz	33297	pediatric osteosarcoma
GSM322692	177 replicate 2	GSM322692	Public on Sep 08 2009	Sep 19 2008	Aug 10 2012	RNA	1	osteosarcoma tumor 177	Homo sapiens	tissue: pediatric osteosarcoma	Cells were harvested with Tripsin (Invitrogen) as per manifacturers instructions	Normal human osteoblasts (HOB) are primary osteoblasts from the hip bone of a normal male donor that were purchased from PromoCell (Heidelberg	Germany	Catalogue # C-12760) and maintained in medium provided by the manufacturer and used at culture passage 3. Three days after plating (~80% confluent)	cells where harvested for DNA or RNA extractions.	total RNA	Total RNA from tumours cells and HOB was extracted using the TRIzol reagent method as per manifacturers instructions (Invitrogen	Osaka	Japan).	TdT labeling kit	Labeling	hybridization and scanning were performed as per Affymetrix GeneChip庐 Whole Transcript (WT) Sense Target Labeling Assay Manual version 4 (P/N 701880 Rev 4). (http://www.affymetrix.com/support/technical/byproduct.affx?product=hugene-1_0-st-v1).	9606	Labeling	hybridization and scanning were performed as per Affymetrix GeneChip庐 Whole Transcript (WT) Sense Target Labeling Assay Manual version 4 (P/N 701880 Rev 4). (http://www.affymetrix.com/support/technical/byproduct.affx?product=hugene-1_0-st-v1).	Labeling	hybridization and scanning were performed as per Affymetrix GeneChip庐 Whole Transcript (WT) Sense Target Labeling Assay Manual version 4 (P/N 701880 Rev 4). (http://www.affymetrix.com/support/technical/byproduct.affx?product=hugene-1_0-st-v1).	gene expression data 177 bioreplicate 2	Data from RNA expression array experiments in the form of .cel files (GCOS 1.3 software) were imported into and analysed using the Partek Genomic Suite Software (PGS). The expression array .cel files for osteoblasts and tumour samples (2 arrays each) were imported using PGS Gene Expression Workflow tool (subject to RMA normalization and log2 transformation). The significantly over- and under-expr…	either specifically for each tumour sample or cumulatively (i.e. mean signal of all tumours vs. osteoblasts). Significantly over- and under-expressed regions were annotated to the corresponding genes present on the Affymetrix Gene 1.0 Array using the HuGene-1_0-st-v1.na24.hg18.transcript.csv file.	GPL6244	Bekim		Sadikovic	bsadikov@gmail.com	The SickKids Hospital and Princess Margaret Hospital	555 University Avenue	Toronto	Ontario	M5G 1X8	Canada	ftp://ftp.ncbi.nlm.nih.gov/geo/samples/GSM322nnn/GSM322692/suppl/GSM322692.CEL.gz	ftp://ftp.ncbi.nlm.nih.gov/geo/samples/GSM322nnn/GSM322692/suppl/GSM322692.chp.gz	33297	pediatric osteosarcoma
GSM322693	178 replicate 1	GSM322693	Public on Sep 08 2009	Sep 19 2008	Aug 10 2012	RNA	1	osteosarcoma tumor 178	Homo sapiens	tissue: pediatric osteosarcoma	Cells were harvested with Tripsin (Invitrogen) as per manifacturers instructions	Normal human osteoblasts (HOB) are primary osteoblasts from the hip bone of a normal male donor that were purchased from PromoCell (Heidelberg	Germany	Catalogue # C-12760) and maintained in medium provided by the manufacturer and used at culture passage 3. Three days after plating (~80% confluent)	cells where harvested for DNA or RNA extractions.	total RNA	Total RNA from tumours cells and HOB was extracted using the TRIzol reagent method as per manifacturers instructions (Invitrogen	Osaka	Japan).	TdT labeling kit	Labeling	hybridization and scanning were performed as per Affymetrix GeneChip庐 Whole Transcript (WT) Sense Target Labeling Assay Manual version 4 (P/N 701880 Rev 4). (http://www.affymetrix.com/support/technical/byproduct.affx?product=hugene-1_0-st-v1).	9606	Labeling	hybridization and scanning were performed as per Affymetrix GeneChip庐 Whole Transcript (WT) Sense Target Labeling Assay Manual version 4 (P/N 701880 Rev 4). (http://www.affymetrix.com/support/technical/byproduct.affx?product=hugene-1_0-st-v1).	Labeling	hybridization and scanning were performed as per Affymetrix GeneChip庐 Whole Transcript (WT) Sense Target Labeling Assay Manual version 4 (P/N 701880 Rev 4). (http://www.affymetrix.com/support/technical/byproduct.affx?product=hugene-1_0-st-v1).	gene expression data 178 bioreplicate 1	Data from RNA expression array experiments in the form of .cel files (GCOS 1.3 software) were imported into and analysed using the Partek Genomic Suite Software (PGS). The expression array .cel files for osteoblasts and tumour samples (2 arrays each) were imported using PGS Gene Expression Workflow tool (subject to RMA normalization and log2 transformation). The significantly over- and under-expr…	either specifically for each tumour sample or cumulatively (i.e. mean signal of all tumours vs. osteoblasts). Significantly over- and under-expressed regions were annotated to the corresponding genes present on the Affymetrix Gene 1.0 Array using the HuGene-1_0-st-v1.na24.hg18.transcript.csv file.	GPL6244	Bekim		Sadikovic	bsadikov@gmail.com	The SickKids Hospital and Princess Margaret Hospital	555 University Avenue	Toronto	Ontario	M5G 1X8	Canada	ftp://ftp.ncbi.nlm.nih.gov/geo/samples/GSM322nnn/GSM322693/suppl/GSM322693.CEL.gz	ftp://ftp.ncbi.nlm.nih.gov/geo/samples/GSM322nnn/GSM322693/suppl/GSM322693.chp.gz	33297	pediatric osteosarcoma
GSM322694	178 replicate 2	GSM322694	Public on Sep 08 2009	Sep 19 2008	Aug 10 2012	RNA	1	osteosarcoma tumor 178	Homo sapiens	tissue: pediatric osteosarcoma	Cells were harvested with Tripsin (Invitrogen) as per manifacturers instructions	Normal human osteoblasts (HOB) are primary osteoblasts from the hip bone of a normal male donor that were purchased from PromoCell (Heidelberg	Germany	Catalogue # C-12760) and maintained in medium provided by the manufacturer and used at culture passage 3. Three days after plating (~80% confluent)	cells where harvested for DNA or RNA extractions.	total RNA	Total RNA from tumours cells and HOB was extracted using the TRIzol reagent method as per manifacturers instructions (Invitrogen	Osaka	Japan).	TdT labeling kit	Labeling	hybridization and scanning were performed as per Affymetrix GeneChip庐 Whole Transcript (WT) Sense Target Labeling Assay Manual version 4 (P/N 701880 Rev 4). (http://www.affymetrix.com/support/technical/byproduct.affx?product=hugene-1_0-st-v1).	9606	Labeling	hybridization and scanning were performed as per Affymetrix GeneChip庐 Whole Transcript (WT) Sense Target Labeling Assay Manual version 4 (P/N 701880 Rev 4). (http://www.affymetrix.com/support/technical/byproduct.affx?product=hugene-1_0-st-v1).	Labeling	hybridization and scanning were performed as per Affymetrix GeneChip庐 Whole Transcript (WT) Sense Target Labeling Assay Manual version 4 (P/N 701880 Rev 4). (http://www.affymetrix.com/support/technical/byproduct.affx?product=hugene-1_0-st-v1).	gene expression data 178 bioreplicate 2	Data from RNA expression array experiments in the form of .cel files (GCOS 1.3 software) were imported into and analysed using the Partek Genomic Suite Software (PGS). The expression array .cel files for osteoblasts and tumour samples (2 arrays each) were imported using PGS Gene Expression Workflow tool (subject to RMA normalization and log2 transformation). The significantly over- and under-expr…	either specifically for each tumour sample or cumulatively (i.e. mean signal of all tumours vs. osteoblasts). Significantly over- and under-expressed regions were annotated to the corresponding genes present on the Affymetrix Gene 1.0 Array using the HuGene-1_0-st-v1.na24.hg18.transcript.csv file.	GPL6244	Bekim		Sadikovic	bsadikov@gmail.com	The SickKids Hospital and Princess Margaret Hospital	555 University Avenue	Toronto	Ontario	M5G 1X8	Canada	ftp://ftp.ncbi.nlm.nih.gov/geo/samples/GSM322nnn/GSM322694/suppl/GSM322694.CEL.gz	ftp://ftp.ncbi.nlm.nih.gov/geo/samples/GSM322nnn/GSM322694/suppl/GSM322694.chp.gz	33297	pediatric osteosarcoma
GSM322695	179 replicate 1	GSM322695	Public on Sep 08 2009	Sep 19 2008	Aug 10 2012	RNA	1	osteosarcoma tumor 179	Homo sapiens	tissue: pediatric osteosarcoma	Cells were harvested with Tripsin (Invitrogen) as per manifacturers instructions	Normal human osteoblasts (HOB) are primary osteoblasts from the hip bone of a normal male donor that were purchased from PromoCell (Heidelberg	Germany	Catalogue # C-12760) and maintained in medium provided by the manufacturer and used at culture passage 3. Three days after plating (~80% confluent)	cells where harvested for DNA or RNA extractions.	total RNA	Total RNA from tumours cells and HOB was extracted using the TRIzol reagent method as per manifacturers instructions (Invitrogen	Osaka	Japan).	TdT labeling kit	Labeling	hybridization and scanning were performed as per Affymetrix GeneChip庐 Whole Transcript (WT) Sense Target Labeling Assay Manual version 4 (P/N 701880 Rev 4). (http://www.affymetrix.com/support/technical/byproduct.affx?product=hugene-1_0-st-v1).	9606	Labeling	hybridization and scanning were performed as per Affymetrix GeneChip庐 Whole Transcript (WT) Sense Target Labeling Assay Manual version 4 (P/N 701880 Rev 4). (http://www.affymetrix.com/support/technical/byproduct.affx?product=hugene-1_0-st-v1).	Labeling	hybridization and scanning were performed as per Affymetrix GeneChip庐 Whole Transcript (WT) Sense Target Labeling Assay Manual version 4 (P/N 701880 Rev 4). (http://www.affymetrix.com/support/technical/byproduct.affx?product=hugene-1_0-st-v1).	gene expression data 179 bioreplicate 1	Data from RNA expression array experiments in the form of .cel files (GCOS 1.3 software) were imported into and analysed using the Partek Genomic Suite Software (PGS). The expression array .cel files for osteoblasts and tumour samples (2 arrays each) were imported using PGS Gene Expression Workflow tool (subject to RMA normalization and log2 transformation). The significantly over- and under-expr…	either specifically for each tumour sample or cumulatively (i.e. mean signal of all tumours vs. osteoblasts). Significantly over- and under-expressed regions were annotated to the corresponding genes present on the Affymetrix Gene 1.0 Array using the HuGene-1_0-st-v1.na24.hg18.transcript.csv file.	GPL6244	Bekim		Sadikovic	bsadikov@gmail.com	The SickKids Hospital and Princess Margaret Hospital	555 University Avenue	Toronto	Ontario	M5G 1X8	Canada	ftp://ftp.ncbi.nlm.nih.gov/geo/samples/GSM322nnn/GSM322695/suppl/GSM322695.CEL.gz	ftp://ftp.ncbi.nlm.nih.gov/geo/samples/GSM322nnn/GSM322695/suppl/GSM322695.chp.gz	33297	pediatric osteosarcoma
GSM322696	179 replicate 2	GSM322696	Public on Sep 08 2009	Sep 19 2008	Aug 10 2012	RNA	1	osteosarcoma tumor 179	Homo sapiens	tissue: pediatric osteosarcoma	Cells were harvested with Tripsin (Invitrogen) as per manifacturers instructions	Normal human osteoblasts (HOB) are primary osteoblasts from the hip bone of a normal male donor that were purchased from PromoCell (Heidelberg	Germany	Catalogue # C-12760) and maintained in medium provided by the manufacturer and used at culture passage 3. Three days after plating (~80% confluent)	cells where harvested for DNA or RNA extractions.	total RNA	Total RNA from tumours cells and HOB was extracted using the TRIzol reagent method as per manifacturers instructions (Invitrogen	Osaka	Japan).	TdT labeling kit	Labeling	hybridization and scanning were performed as per Affymetrix GeneChip庐 Whole Transcript (WT) Sense Target Labeling Assay Manual version 4 (P/N 701880 Rev 4). (http://www.affymetrix.com/support/technical/byproduct.affx?product=hugene-1_0-st-v1).	9606	Labeling	hybridization and scanning were performed as per Affymetrix GeneChip庐 Whole Transcript (WT) Sense Target Labeling Assay Manual version 4 (P/N 701880 Rev 4). (http://www.affymetrix.com/support/technical/byproduct.affx?product=hugene-1_0-st-v1).	Labeling	hybridization and scanning were performed as per Affymetrix GeneChip庐 Whole Transcript (WT) Sense Target Labeling Assay Manual version 4 (P/N 701880 Rev 4). (http://www.affymetrix.com/support/technical/byproduct.affx?product=hugene-1_0-st-v1).	gene expression data 179 bioreplicate 2	Data from RNA expression array experiments in the form of .cel files (GCOS 1.3 software) were imported into and analysed using the Partek Genomic Suite Software (PGS). The expression array .cel files for osteoblasts and tumour samples (2 arrays each) were imported using PGS Gene Expression Workflow tool (subject to RMA normalization and log2 transformation). The significantly over- and under-expr…	either specifically for each tumour sample or cumulatively (i.e. mean signal of all tumours vs. osteoblasts). Significantly over- and under-expressed regions were annotated to the corresponding genes present on the Affymetrix Gene 1.0 Array using the HuGene-1_0-st-v1.na24.hg18.transcript.csv file.	GPL6244	Bekim		Sadikovic	bsadikov@gmail.com	The SickKids Hospital and Princess Margaret Hospital	555 University Avenue	Toronto	Ontario	M5G 1X8	Canada	ftp://ftp.ncbi.nlm.nih.gov/geo/samples/GSM322nnn/GSM322696/suppl/GSM322696.CEL.gz	ftp://ftp.ncbi.nlm.nih.gov/geo/samples/GSM322nnn/GSM322696/suppl/GSM322696.chp.gz	33297	pediatric osteosarcoma
GSM322697	180 replicate 1	GSM322697	Public on Sep 08 2009	Sep 19 2008	Aug 10 2012	RNA	1	osteosarcoma tumor 180	Homo sapiens	tissue: pediatric osteosarcoma	Cells were harvested with Tripsin (Invitrogen) as per manifacturers instructions	Normal human osteoblasts (HOB) are primary osteoblasts from the hip bone of a normal male donor that were purchased from PromoCell (Heidelberg	Germany	Catalogue # C-12760) and maintained in medium provided by the manufacturer and used at culture passage 3. Three days after plating (~80% confluent)	cells where harvested for DNA or RNA extractions.	total RNA	Total RNA from tumours cells and HOB was extracted using the TRIzol reagent method as per manifacturers instructions (Invitrogen	Osaka	Japan).	TdT labeling kit	Labeling	hybridization and scanning were performed as per Affymetrix GeneChip庐 Whole Transcript (WT) Sense Target Labeling Assay Manual version 4 (P/N 701880 Rev 4). (http://www.affymetrix.com/support/technical/byproduct.affx?product=hugene-1_0-st-v1).	9606	Labeling	hybridization and scanning were performed as per Affymetrix GeneChip庐 Whole Transcript (WT) Sense Target Labeling Assay Manual version 4 (P/N 701880 Rev 4). (http://www.affymetrix.com/support/technical/byproduct.affx?product=hugene-1_0-st-v1).	Labeling	hybridization and scanning were performed as per Affymetrix GeneChip庐 Whole Transcript (WT) Sense Target Labeling Assay Manual version 4 (P/N 701880 Rev 4). (http://www.affymetrix.com/support/technical/byproduct.affx?product=hugene-1_0-st-v1).	gene expression data 180 bioreplicate 1	Data from RNA expression array experiments in the form of .cel files (GCOS 1.3 software) were imported into and analysed using the Partek Genomic Suite Software (PGS). The expression array .cel files for osteoblasts and tumour samples (2 arrays each) were imported using PGS Gene Expression Workflow tool (subject to RMA normalization and log2 transformation). The significantly over- and under-expr…	either specifically for each tumour sample or cumulatively (i.e. mean signal of all tumours vs. osteoblasts). Significantly over- and under-expressed regions were annotated to the corresponding genes present on the Affymetrix Gene 1.0 Array using the HuGene-1_0-st-v1.na24.hg18.transcript.csv file.	GPL6244	Bekim		Sadikovic	bsadikov@gmail.com	The SickKids Hospital and Princess Margaret Hospital	555 University Avenue	Toronto	Ontario	M5G 1X8	Canada	ftp://ftp.ncbi.nlm.nih.gov/geo/samples/GSM322nnn/GSM322697/suppl/GSM322697.CEL.gz	ftp://ftp.ncbi.nlm.nih.gov/geo/samples/GSM322nnn/GSM322697/suppl/GSM322697.chp.gz	33297	pediatric osteosarcoma
GSM322698	180 replicate 2	GSM322698	Public on Sep 08 2009	Sep 19 2008	Aug 10 2012	RNA	1	osteosarcoma tumor 180	Homo sapiens	tissue: pediatric osteosarcoma	Cells were harvested with Tripsin (Invitrogen) as per manifacturers instructions	Normal human osteoblasts (HOB) are primary osteoblasts from the hip bone of a normal male donor that were purchased from PromoCell (Heidelberg	Germany	Catalogue # C-12760) and maintained in medium provided by the manufacturer and used at culture passage 3. Three days after plating (~80% confluent)	cells where harvested for DNA or RNA extractions.	total RNA	Total RNA from tumours cells and HOB was extracted using the TRIzol reagent method as per manifacturers instructions (Invitrogen	Osaka	Japan).	TdT labeling kit	Labeling	hybridization and scanning were performed as per Affymetrix GeneChip庐 Whole Transcript (WT) Sense Target Labeling Assay Manual version 4 (P/N 701880 Rev 4). (http://www.affymetrix.com/support/technical/byproduct.affx?product=hugene-1_0-st-v1).	9606	Labeling	hybridization and scanning were performed as per Affymetrix GeneChip庐 Whole Transcript (WT) Sense Target Labeling Assay Manual version 4 (P/N 701880 Rev 4). (http://www.affymetrix.com/support/technical/byproduct.affx?product=hugene-1_0-st-v1).	Labeling	hybridization and scanning were performed as per Affymetrix GeneChip庐 Whole Transcript (WT) Sense Target Labeling Assay Manual version 4 (P/N 701880 Rev 4). (http://www.affymetrix.com/support/technical/byproduct.affx?product=hugene-1_0-st-v1).	gene expression data 180 bioreplicate 2	Data from RNA expression array experiments in the form of .cel files (GCOS 1.3 software) were imported into and analysed using the Partek Genomic Suite Software (PGS). The expression array .cel files for osteoblasts and tumour samples (2 arrays each) were imported using PGS Gene Expression Workflow tool (subject to RMA normalization and log2 transformation). The significantly over- and under-expr…	either specifically for each tumour sample or cumulatively (i.e. mean signal of all tumours vs. osteoblasts). Significantly over- and under-expressed regions were annotated to the corresponding genes present on the Affymetrix Gene 1.0 Array using the HuGene-1_0-st-v1.na24.hg18.transcript.csv file.	GPL6244	Bekim		Sadikovic	bsadikov@gmail.com	The SickKids Hospital and Princess Margaret Hospital	555 University Avenue	Toronto	Ontario	M5G 1X8	Canada	ftp://ftp.ncbi.nlm.nih.gov/geo/samples/GSM322nnn/GSM322698/suppl/GSM322698.CEL.gz	ftp://ftp.ncbi.nlm.nih.gov/geo/samples/GSM322nnn/GSM322698/suppl/GSM322698.chp.gz	33297	pediatric osteosarcoma
GSM322699	182 replicate 1	GSM322699	Public on Sep 08 2009	Sep 19 2008	Aug 10 2012	RNA	1	osteosarcoma tumor 182	Homo sapiens	tissue: pediatric osteosarcoma	Cells were harvested with Tripsin (Invitrogen) as per manifacturers instructions	Normal human osteoblasts (HOB) are primary osteoblasts from the hip bone of a normal male donor that were purchased from PromoCell (Heidelberg	Germany	Catalogue # C-12760) and maintained in medium provided by the manufacturer and used at culture passage 3. Three days after plating (~80% confluent)	cells where harvested for DNA or RNA extractions.	total RNA	Total RNA from tumours cells and HOB was extracted using the TRIzol reagent method as per manifacturers instructions (Invitrogen	Osaka	Japan).	TdT labeling kit	Labeling	hybridization and scanning were performed as per Affymetrix GeneChip庐 Whole Transcript (WT) Sense Target Labeling Assay Manual version 4 (P/N 701880 Rev 4). (http://www.affymetrix.com/support/technical/byproduct.affx?product=hugene-1_0-st-v1).	9606	Labeling	hybridization and scanning were performed as per Affymetrix GeneChip庐 Whole Transcript (WT) Sense Target Labeling Assay Manual version 4 (P/N 701880 Rev 4). (http://www.affymetrix.com/support/technical/byproduct.affx?product=hugene-1_0-st-v1).	Labeling	hybridization and scanning were performed as per Affymetrix GeneChip庐 Whole Transcript (WT) Sense Target Labeling Assay Manual version 4 (P/N 701880 Rev 4). (http://www.affymetrix.com/support/technical/byproduct.affx?product=hugene-1_0-st-v1).	gene expression data 182 bioreplicate 1	Data from RNA expression array experiments in the form of .cel files (GCOS 1.3 software) were imported into and analysed using the Partek Genomic Suite Software (PGS). The expression array .cel files for osteoblasts and tumour samples (2 arrays each) were imported using PGS Gene Expression Workflow tool (subject to RMA normalization and log2 transformation). The significantly over- and under-expr…	either specifically for each tumour sample or cumulatively (i.e. mean signal of all tumours vs. osteoblasts). Significantly over- and under-expressed regions were annotated to the corresponding genes present on the Affymetrix Gene 1.0 Array using the HuGene-1_0-st-v1.na24.hg18.transcript.csv file.	GPL6244	Bekim		Sadikovic	bsadikov@gmail.com	The SickKids Hospital and Princess Margaret Hospital	555 University Avenue	Toronto	Ontario	M5G 1X8	Canada	ftp://ftp.ncbi.nlm.nih.gov/geo/samples/GSM322nnn/GSM322699/suppl/GSM322699.CEL.gz	ftp://ftp.ncbi.nlm.nih.gov/geo/samples/GSM322nnn/GSM322699/suppl/GSM322699.chp.gz	33297	pediatric osteosarcoma
GSM322700	182 replicate 2	GSM322700	Public on Sep 08 2009	Sep 19 2008	Aug 10 2012	RNA	1	osteosarcoma tumor 182	Homo sapiens	tissue: pediatric osteosarcoma	Cells were harvested with Tripsin (Invitrogen) as per manifacturers instructions	Normal human osteoblasts (HOB) are primary osteoblasts from the hip bone of a normal male donor that were purchased from PromoCell (Heidelberg	Germany	Catalogue # C-12760) and maintained in medium provided by the manufacturer and used at culture passage 3. Three days after plating (~80% confluent)	cells where harvested for DNA or RNA extractions.	total RNA	Total RNA from tumours cells and HOB was extracted using the TRIzol reagent method as per manifacturers instructions (Invitrogen	Osaka	Japan).	TdT labeling kit	Labeling	hybridization and scanning were performed as per Affymetrix GeneChip庐 Whole Transcript (WT) Sense Target Labeling Assay Manual version 4 (P/N 701880 Rev 4). (http://www.affymetrix.com/support/technical/byproduct.affx?product=hugene-1_0-st-v1).	9606	Labeling	hybridization and scanning were performed as per Affymetrix GeneChip庐 Whole Transcript (WT) Sense Target Labeling Assay Manual version 4 (P/N 701880 Rev 4). (http://www.affymetrix.com/support/technical/byproduct.affx?product=hugene-1_0-st-v1).	Labeling	hybridization and scanning were performed as per Affymetrix GeneChip庐 Whole Transcript (WT) Sense Target Labeling Assay Manual version 4 (P/N 701880 Rev 4). (http://www.affymetrix.com/support/technical/byproduct.affx?product=hugene-1_0-st-v1).	gene expression data 182 bioreplicate 2	Data from RNA expression array experiments in the form of .cel files (GCOS 1.3 software) were imported into and analysed using the Partek Genomic Suite Software (PGS). The expression array .cel files for osteoblasts and tumour samples (2 arrays each) were imported using PGS Gene Expression Workflow tool (subject to RMA normalization and log2 transformation). The significantly over- and under-expr…	either specifically for each tumour sample or cumulatively (i.e. mean signal of all tumours vs. osteoblasts). Significantly over- and under-expressed regions were annotated to the corresponding genes present on the Affymetrix Gene 1.0 Array using the HuGene-1_0-st-v1.na24.hg18.transcript.csv file.	GPL6244	Bekim		Sadikovic	bsadikov@gmail.com	The SickKids Hospital and Princess Margaret Hospital	555 University Avenue	Toronto	Ontario	M5G 1X8	Canada	ftp://ftp.ncbi.nlm.nih.gov/geo/samples/GSM322nnn/GSM322700/suppl/GSM322700.CEL.gz	ftp://ftp.ncbi.nlm.nih.gov/geo/samples/GSM322nnn/GSM322700/suppl/GSM322700.chp.gz	33297	pediatric osteosarcoma
GSM322701	183 replicate 1	GSM322701	Public on Sep 08 2009	Sep 19 2008	Aug 10 2012	RNA	1	osteosarcoma tumor 183	Homo sapiens	tissue: pediatric osteosarcoma	Cells were harvested with Tripsin (Invitrogen) as per manifacturers instructions	Normal human osteoblasts (HOB) are primary osteoblasts from the hip bone of a normal male donor that were purchased from PromoCell (Heidelberg	Germany	Catalogue # C-12760) and maintained in medium provided by the manufacturer and used at culture passage 3. Three days after plating (~80% confluent)	cells where harvested for DNA or RNA extractions.	total RNA	Total RNA from tumours cells and HOB was extracted using the TRIzol reagent method as per manifacturers instructions (Invitrogen	Osaka	Japan).	TdT labeling kit	Labeling	hybridization and scanning were performed as per Affymetrix GeneChip庐 Whole Transcript (WT) Sense Target Labeling Assay Manual version 4 (P/N 701880 Rev 4). (http://www.affymetrix.com/support/technical/byproduct.affx?product=hugene-1_0-st-v1).	9606	Labeling	hybridization and scanning were performed as per Affymetrix GeneChip庐 Whole Transcript (WT) Sense Target Labeling Assay Manual version 4 (P/N 701880 Rev 4). (http://www.affymetrix.com/support/technical/byproduct.affx?product=hugene-1_0-st-v1).	Labeling	hybridization and scanning were performed as per Affymetrix GeneChip庐 Whole Transcript (WT) Sense Target Labeling Assay Manual version 4 (P/N 701880 Rev 4). (http://www.affymetrix.com/support/technical/byproduct.affx?product=hugene-1_0-st-v1).	gene expression data 183 bioreplicate 1	Data from RNA expression array experiments in the form of .cel files (GCOS 1.3 software) were imported into and analysed using the Partek Genomic Suite Software (PGS). The expression array .cel files for osteoblasts and tumour samples (2 arrays each) were imported using PGS Gene Expression Workflow tool (subject to RMA normalization and log2 transformation). The significantly over- and under-expr…	either specifically for each tumour sample or cumulatively (i.e. mean signal of all tumours vs. osteoblasts). Significantly over- and under-expressed regions were annotated to the corresponding genes present on the Affymetrix Gene 1.0 Array using the HuGene-1_0-st-v1.na24.hg18.transcript.csv file.	GPL6244	Bekim		Sadikovic	bsadikov@gmail.com	The SickKids Hospital and Princess Margaret Hospital	555 University Avenue	Toronto	Ontario	M5G 1X8	Canada	ftp://ftp.ncbi.nlm.nih.gov/geo/samples/GSM322nnn/GSM322701/suppl/GSM322701.CEL.gz	ftp://ftp.ncbi.nlm.nih.gov/geo/samples/GSM322nnn/GSM322701/suppl/GSM322701.chp.gz	33297	pediatric osteosarcoma
GSM322702	183 replicate 2	GSM322702	Public on Sep 08 2009	Sep 19 2008	Aug 10 2012	RNA	1	osteosarcoma tumor 183	Homo sapiens	tissue: pediatric osteosarcoma	Cells were harvested with Tripsin (Invitrogen) as per manifacturers instructions	Normal human osteoblasts (HOB) are primary osteoblasts from the hip bone of a normal male donor that were purchased from PromoCell (Heidelberg	Germany	Catalogue # C-12760) and maintained in medium provided by the manufacturer and used at culture passage 3. Three days after plating (~80% confluent)	cells where harvested for DNA or RNA extractions.	total RNA	Total RNA from tumours cells and HOB was extracted using the TRIzol reagent method as per manifacturers instructions (Invitrogen	Osaka	Japan).	TdT labeling kit	Labeling	hybridization and scanning were performed as per Affymetrix GeneChip庐 Whole Transcript (WT) Sense Target Labeling Assay Manual version 4 (P/N 701880 Rev 4). (http://www.affymetrix.com/support/technical/byproduct.affx?product=hugene-1_0-st-v1).	9606	Labeling	hybridization and scanning were performed as per Affymetrix GeneChip庐 Whole Transcript (WT) Sense Target Labeling Assay Manual version 4 (P/N 701880 Rev 4). (http://www.affymetrix.com/support/technical/byproduct.affx?product=hugene-1_0-st-v1).	Labeling	hybridization and scanning were performed as per Affymetrix GeneChip庐 Whole Transcript (WT) Sense Target Labeling Assay Manual version 4 (P/N 701880 Rev 4). (http://www.affymetrix.com/support/technical/byproduct.affx?product=hugene-1_0-st-v1).	gene expression data 183 bioreplicate 2	Data from RNA expression array experiments in the form of .cel files (GCOS 1.3 software) were imported into and analysed using the Partek Genomic Suite Software (PGS). The expression array .cel files for osteoblasts and tumour samples (2 arrays each) were imported using PGS Gene Expression Workflow tool (subject to RMA normalization and log2 transformation). The significantly over- and under-expr…	either specifically for each tumour sample or cumulatively (i.e. mean signal of all tumours vs. osteoblasts). Significantly over- and under-expressed regions were annotated to the corresponding genes present on the Affymetrix Gene 1.0 Array using the HuGene-1_0-st-v1.na24.hg18.transcript.csv file.	GPL6244	Bekim		Sadikovic	bsadikov@gmail.com	The SickKids Hospital and Princess Margaret Hospital	555 University Avenue	Toronto	Ontario	M5G 1X8	Canada	ftp://ftp.ncbi.nlm.nih.gov/geo/samples/GSM322nnn/GSM322702/suppl/GSM322702.CEL.gz	ftp://ftp.ncbi.nlm.nih.gov/geo/samples/GSM322nnn/GSM322702/suppl/GSM322702.chp.gz	33297	pediatric osteosarcoma
[truncated: 1 more columns]

## Sheet: TARGET-OS
TARGET USI	Gender	Race	Ethnicity	Age at Diagnosis in Days	First Event	Time to First Event in Days	Vital Status	Overall Survival Time in Days	Year of Diagnosis	Year of Last Follow Up	Protocol	Disease at diagnosis	Metastasis site	Primary tumor site	Specific tumor site	Specific tumor side	Specific tumor region	Definitive Surgery	Primary site progression	Site of initial relapse	Time to first relapse in days	Time to first enrollment on relapse protocol in days	Time to first SMN in days	Time to death in days	Histologic response	Percent necrosis	Relapse Type	Therapy	Comment
TARGET-40-PALWWX	Female	White	Not Hispanic or Latino	4464	Censored	2163	Alive	2163	2002	2008	AOST0121	Metastatic	Lung only	Leg/foot	Femur	Right	Distal	Limb sparing			NA	NA	NA	NA		98			NA	NA	NA
TARGET-40-PAMEKS	Male	Asian	Not Hispanic or Latino	3942	Relapse	385	Dead	857	2003	2005	AOST0121	Metastatic	Lung only	Leg/foot	Femur	Right	Distal	Limb sparing		Lung	385	NA	NA	857		50			NA	NA	NA
TARGET-40-PAMLKS	Female	White	Not Hispanic or Latino	4509	Relapse	71	Dead	180	2003	2004	AOST0121	Metastatic	Bone and lung	Leg/foot	Femur	Right	Distal				71	NA	NA	180					NA	NA	NA
TARGET-40-PAMRHD	Female	Unknown	Not Hispanic or Latino	3942	Relapse	39	Dead	74	2003	2003	AOST0121	Metastatic	Bone and lung	Leg/foot	Femur	Right	Distal			Lung	39	NA	NA	74					NA	NA	NA
TARGET-40-PAMYYJ	Male	White	Not Hispanic or Latino	6477	Relapse	128	Dead	271	2004	2005	AOST0121	Metastatic	Lung only	Leg/foot	Leg NOS					Lung	128	NA	NA	271		67			NA	NA	NA
TARGET-40-PANMIG	Male	White	Not Hispanic or Latino	5360	Relapse	513	Dead	776	2005	2007	AOST0121	Metastatic	Lung only	Leg/foot	Tibia	Right	Proximal	Limb sparing		Lung	513	NA	NA	776		95			NA	NA	NA
TARGET-40-PANPUM	Male	White	Not Hispanic or Latino	5996	Relapse	46	Dead	295	2005	2006	AOST0121	Metastatic	Lung only	Pelvis	Ilium	Left					46	NA	NA	295					NA	NA	NA
TARGET-40-PANZHX	Female	Asian	Not Hispanic or Latino	5127	Relapse	812	Alive	1323	2005	2009	AOST0121	Metastatic	Bone and lung	Leg/foot	Tibia	Left		Limb sparing		Non-bone	non-lung	812	NA	NA	NA		70			NA	NA	NA
TARGET-40-PAPIJR	Female	White	Hispanic or Latino	4597	No event	1719	Alive	1719	2006	2010	AOST0331	Non-metastatic		Leg/foot	Femur		Distal	Limb sparing			NA	NA	NA	NA	0-90				NA	NA	NA
TARGET-40-PAPKWD	Male	White	Not Hispanic or Latino	3478	Relapse	192	Dead	422	2006	2007	AOST0331	Non-metastatic		Leg/foot	Femur		Distal	Limb sparing	No	Non-bone	non-lung	192	NA	NA	422	0-90				NA	NA	NA
TARGET-40-PAPNVD	Female	White	Hispanic or Latino	5289	Relapse	594	Dead	922	2006	2009	AOST0331	Non-metastatic		Leg/foot	Fibula		Proximal	Limb sparing	Yes		594	NA	NA	922	0-90				NA	NA	NA
TARGET-40-PAPWWC	Female	White	Not Hispanic or Latino	3595	Relapse	1933	Alive	2520	2006	2013	AOST0331	Non-metastatic		Leg/foot	Femur		Distal	Limb sparing	No	Lung	1933	NA	NA	NA	0-90				NA	NA	NA
TARGET-40-PAPXGT	Female	Black or African American	Not Hispanic or Latino	4172	No event	2526	Alive	2526	2006	2013	AOST0331	Non-metastatic		Leg/foot	Tibia		Proximal	Limb sparing			NA	NA	NA	NA	0-90				NA	NA	NA
TARGET-40-PARBGW	Female	Unknown	Hispanic or Latino	4634	No event	286	Alive	286	2007	2007	AOST0331	Metastatic	Bone only	Leg/foot	Femur		Distal	Limb sparing			NA	NA	NA	NA	0-90				NA	NA	NA
TARGET-40-PARDAX	Male	White	Not Hispanic or Latino	3680	Relapse	105	Dead	679	2007	2009	AOST0331	Metastatic	Lung only	Leg/foot	Femur		Distal		Yes	Other bone	105	NA	582	679					NA	NA	NA
TARGET-40-PARFTG	Female	Asian	Not Hispanic or Latino	4987	Relapse	53	Dead	653	2007	2009	AOST0331	Non-metastatic		Leg/foot	Femur		Distal	Limb sparing	Yes		53	NA	NA	653	0-90				NA	NA	NA
TARGET-40-PARGTM	Male	White	Not Hispanic or Latino	5925	No event	2610	Alive	2610	2007	2014	AOST0331	Non-metastatic		Leg/foot	Tibia		Proximal	Limb sparing			NA	NA	NA	NA	91-100				NA	NA	NA
TARGET-40-PARJXU	Female	White	Not Hispanic or Latino	4624	Relapse	811	Dead	1631	2007	2012	AOST0331	Metastatic	Lung only	Leg/foot	Femur		Distal	Limb sparing	No		811	NA	NA	1631	91-100				NA	NA	NA
TARGET-40-PARKAF	Male	White	Not Hispanic or Latino	6085	Relapse	56	Dead	1061	2007	2010	AOST0331	Non-metastatic		Leg/foot	Femur		Distal	Limb sparing	Yes		56	NA	NA	1061	0-90				NA	NA	NA
TARGET-40-PASEBY	Male	White	Not Hispanic or Latino	4249	Relapse	42	Alive	2049	2008	2014	AOST0331	Non-metastatic		Leg/foot	Femur		Distal		Yes		42	NA	NA	NA					NA	NA	NA
TARGET-40-PASEFS	Male	White	Not Hispanic or Latino	6625	No event	2112	Alive	2112	2008	2014	AOST0331	Non-metastatic		Leg/foot	Tibia		Proximal	Limb sparing			NA	NA	NA	NA	0-90				NA	NA	NA
TARGET-40-PASFCV	Female	White	Not Hispanic or Latino	3849	No event	2062	Alive	2062	2008	2014	AOST0331	Non-metastatic		Leg/foot	Tibia		Proximal	Amputation			NA	NA	NA	NA	0-90				NA	NA	NA
TARGET-40-PASKZZ	Female	White	Hispanic or Latino	4808	No event	542	Alive	542	2009	2010	AOST0331	Non-metastatic		Leg/foot	Fibula		Proximal	Limb sparing			NA	NA	NA	NA	91-100				NA	NA	NA
TARGET-40-PASSLM	Male	White	Not Hispanic or Latino	3538	Relapse	1865	Alive	1865	2009	2014	AOST0331	Metastatic	Lung only	Arm/hand	Humerus		Proximal	Amputation	No		1865	NA	NA	NA	91-100				NA	NA	NA
TARGET-40-PASUUH	Female	White	Not Hispanic or Latino	5143	No event	1625	Alive	1625	2009	2013	AOST0331	Non-metastatic		Leg/foot	Fibula		Proximal	Limb sparing			NA	NA	NA	NA	91-100				NA	NA	NA
TARGET-40-PASYUK	Female	Unknown	Hispanic or Latino	5931	No event	1870	Alive	1870	2009	2014	AOST0331	Non-metastatic		Leg/foot	Tibia		Proximal	Limb sparing			NA	NA	NA	NA	91-100				NA	NA	NA
TARGET-40-PATAWV	Male	White	Not Hispanic or Latino	5667	No event	1702	Alive	1702	2009	2014	AOST0331	Non-metastatic		Leg/foot	Tibia		Proximal	Limb sparing			NA	NA	NA	NA	91-100				NA	NA	NA
TARGET-40-PATJVI	Male	White	Not Hispanic or Latino	5755	No event	1575	Alive	1575	2010	2014	AOST0331	Metastatic	Lung only	Leg/foot	Fibula		Proximal	Limb sparing			NA	NA	NA	NA	91-100				NA	NA	NA
TARGET-40-PATKSS	Male	White	Not Hispanic or Latino	4889	Relapse	63	Dead	758	2010	2012	AOST0331	Non-metastatic		Pelvis	Pelvis / Sacrum			Limb sparing	Yes		63	NA	NA	758	0-90				NA	NA	NA
TARGET-40-PATMIF	Female	White	Not Hispanic or Latino	4383	No event	1580	Alive	1580	2010	2014	AOST0331	Non-metastatic		Leg/foot	Femur		Distal	Limb sparing			NA	NA	NA	NA	91-100				NA	NA	NA
TARGET-40-PATMPU	Male	Unknown	Unknown	5060	Relapse	498	Dead	1579	2010	2014	AOST0331	Non-metastatic		Leg/foot	Fibula		Proximal	Limb sparing	No	Non-bone	non-lung	498	NA	NA	1579	0-90				NA	NA	NA
TARGET-40-PATPBS	Male	White	Not Hispanic or Latino	5513	No event	1468	Alive	1468	2010	2014	AOST0331	Non-metastatic		Leg/foot	Fibula		Proximal	Limb sparing			NA	NA	NA	NA	91-100				NA	NA	NA
TARGET-40-PASNZV	Male	White	Not Hispanic or Latino	5947	No event	1747	Alive	1747	2009	2014	AOST06B1	Non-metastatic		Leg/foot	Femur						NA	NA	NA	NA					NA	NA	NA
TARGET-40-PASRNE	Female	White	Not Hispanic or Latino	1299	Relapse	512	Alive	1707	2009	2014	AOST06B1	Non-metastatic		Leg/foot	Femur						512	NA	NA	NA					NA	NA	NA
TARGET-40-PATEEM	Male	White	Not Hispanic or Latino	5875	Relapse	961	Alive	1451	2009	2013	AOST06B1	Non-metastatic		Arm/hand	Humerus						961	NA	NA	NA					NA	NA	NA
TARGET-40-PATUXZ	Female	Unknown	Hispanic or Latino	6345	Death	510	Dead	510	2010	2012	AOST06B1	Metastatic	Bone and lung	Leg/foot	Femur						NA	NA	NA	510					NA	NA	NA
TARGET-40-PAUBIT	Female	White	Not Hispanic or Latino	4513	No event	1029	Alive	1029	2011	2014	AOST06B1	Non-metastatic		Leg/foot	Femur						NA	NA	NA	NA					NA	NA	NA
TARGET-40-PAUTWB	Male	White	Not Hispanic or Latino	5064	Relapse	598	Alive	687	2012	2014	AOST06B1	Non-metastatic		Leg/foot	Tibia						598	NA	NA	NA					NA	NA	NA
TARGET-40-PAUTYB	Female	White	Hispanic or Latino	4418	Relapse	527	Dead	537	2012	2013	AOST06B1	Non-metastatic		Leg/foot	Tibia						527	NA	NA	537					NA	NA	NA
TARGET-40-PAUUML	Male	Unknown	Hispanic or Latino	2177	No event	672	Alive	672	2012	2014	AOST06B1	Non-metastatic		Leg/foot	Femur						NA	NA	NA	NA					NA	NA	NA
TARGET-40-PAUVUL	Female	Black or African American	Not Hispanic or Latino	2027	Relapse	237	Dead	347	2012	2013	AOST06B1	Metastatic	Lung only	Leg/foot	Femur						237	NA	NA	347					NA	NA	NA
TARGET-40-PAUXPZ	Female	Unknown	Unknown	4507	Relapse	419	Alive	606	2012	2014	AOST06B1	Metastatic	Lung only	Leg/foot	Tibia						419	NA	NA	724					NA	NA	NA
TARGET-40-PAUYTT	Female	White	Not Hispanic or Latino	6702	No event	579	Alive	579	2012	2014	AOST06B1	Non-metastatic		Leg/foot	Fibula						NA	NA	NA	NA					NA	NA	NA
TARGET-40-PAVALD	Male	White	Hispanic or Latino	5924	No event	551	Alive	551	2012	2014	AOST06B1	Non-metastatic		Leg/foot	Femur						NA	NA	NA	NA					NA	NA	NA
TARGET-40-PAVCLP	Female	Black or African American	Not Hispanic or Latino	4062	No event	511	Alive	511	2012	2014	AOST06B1	Non-metastatic		Leg/foot	Tibia						NA	NA	NA	NA					NA	NA	NA
TARGET-40-PAVDTY	Male	White	Not Hispanic or Latino	4898	No event	369	Alive	369	2012	2013	AOST06B1	Non-metastatic		Leg/foot	Tibia						NA	NA	NA	NA					NA	NA	NA
TARGET-40-PAVECB	Female	White	Not Hispanic or Latino	3272	No event	476	Alive	476	2012	2014	AOST06B1	Non-metastatic		Arm/hand	Radius						NA	NA	NA	NA					NA	NA	NA
TARGET-40-PATMXR	Female	Unknown	Hispanic or Latino	7631	Relapse	68	Dead	386	2010	2011	AOST06P1	Metastatic	Bone and lung	Leg/foot	Femur				Yes		68	NA	NA	386					NA	NA	NA
TARGET-40-0A4HLD	Male			7254	Censored	3946	Alive	3946	2000	2011	IHRT	Non-metastatic		Leg/Foot	Tibia		Proximal	Limb sparing	No		NA	NA	NA	NA	Stage 3/4	99		MTX/Adria/Ifos/±Plat	NA	NA	NA
TARGET-40-0A4HMC	Male	White		10205	Censored	377	Alive	377	NA	NA	IHRT	Non-metastatic		Leg/Foot	Fibula		Other	Not specified	Amputation	No		NA	NA	NA	NA	Stage 1/2	60		Adria/Plat	NA	NA	NA
TARGET-40-0A4HX8	Male	White		10635	Censored	1750	Alive	1750	2003	2011	IHRT	Non-metastatic		Leg/Foot	Femur		Distal	Limb sparing	No		NA	NA	NA	NA	Stage 3/4	100		Pre-op Adria/Ifos/MTX + Adria/Plat; Post-op Adria/Plat + Adria/Ifos	NA	NA	NA
TARGET-40-0A4HXS	Male	White		8470	Censored	2948	Alive	2948	2004	2014	IHRT	Non-metastatic		Leg/Foot	Femur		Distal	Limb sparing	No		NA	NA	NA	NA	Stage 1/2	40		Adria/Plat/MTX	NA	NA	NA
TARGET-40-0A4HY5	Male			7264	Relapse	218	Dead	290	2004	2005	IHRT	Metastatic	Lung only	Leg/Foot	Pelvis		Other	Posterior	Limb sparing	No	Regional Lymph nodes	218	NA	NA	290	Stage 1/2	50		Adria/Plat/MTX	NA	NA	NA
TARGET-40-0A4I0Q	Female			7269	Death	519	Dead	519	2005	2006	IHRT	Metastatic	Lung only	Leg/Foot	Femur		Distal	Limb sparing	No		NA	NA	NA	519	Stage 1/2	< 50		MTX/Adria/Ifos/±Plat	NA	NA	NA
TARGET-40-0A4I0W	Male	Asian		7330	Censored	683	Alive	683	2006	2010	IHRT	Non-metastatic		Leg/Foot	Femur		Distal	Limb sparing	No		NA	NA	NA	NA				Adria/Plat/MTX	NA	NA	NA
TARGET-40-0A4I3S	Male	Black or African American		8313	Censored	1844	Alive	1844	2007	2014	IHRT	Non-metastatic		Leg/Foot	Pelvis - ilium		Other	Posterior	Limb sparing	No		NA	NA	NA	NA				Adria/Plat	NA	NA	NA
TARGET-40-0A4I42	Female			6268	Relapse	351	Dead	619	2007	2009	IHRT	Non-metastatic		Arm/hand	Humerus		Proximal	Limb sparing	No		351	NA	NA	619			Systemic	Adria/Plat/MTX	NA	NA	NA
TARGET-40-0A4I48	Female			5854	Censored	1616	Alive	1616	2008	2014	IHRT	Metastatic	Lung only	Leg/Foot	Femur		Distal	Limb sparing	No		NA	NA	NA	NA	Stage 3/4	99		Adri/Plat/VP-16/Ifos	NA	NA	NA
TARGET-40-0A4I4E	Male			5978		NA		NA	2009	NA	IHRT	Metastatic	Lung only	Leg/Foot	Femur		Proximal	N/A - No surgery	No		NA	NA	NA	NA				Unknown	NA	NA	NA
TARGET-40-0A4I4M	Female	Asian		6916	Censored	708	Alive	708	2010	2014	IHRT	Non-metastatic		Leg/Foot	Tibia		Proximal	Limb sparing	No		NA	NA	NA	NA	Stage 3/4	98		Adria/Plat/MTX	NA	NA	NA
TARGET-40-0A4I4O	Male	White		11828	Relapse	235	Dead	627	2010	2012	IHRT	Non-metastatic		Leg/Foot	Femur		Distal	Limb sparing	No	Lung	235	NA	NA	627	Stage 3/4	95	Systemic	Adria/Plat	NA	NA	NA
TARGET-40-0A4I5B	Male			7615	Censored	619	Alive	619	2010	2014	IHRT	Non-metastatic		Leg/Foot	Tibia		Proximal	Limb sparing	No		NA	NA	NA	NA	Stage 3/4	95		MTX/Adria/Ifos/±Plat	NA	NA	NA
TARGET-40-0A4I6O	Male			6738	Relapse	484	Dead	1906	2004	2009	IHRT	Non-metastatic		Leg/Foot	Tibia		Distal	Amputation	No	Lung	484	NA	NA	1906			Systemic	Adria/Plat/MTX	NA	NA	NA
TARGET-40-0A4I8U	Male			7328	Censored	983	Alive	983	2008	2011	IHRT	Non-metastatic		Leg/Foot	Femur		Distal	Limb sparing	No		NA	NA	NA	NA	Stage 1/2	90		Adria/Plat/MTX	NA	NA	NA
TARGET-40-PAPFLB	Male	White	Not Hispanic or Latino	5496		NA		NA	NA	NA	Other osteosarcoma	Non-metastatic		Leg/foot							NA	NA	NA	NA					NA	NA	NA
TARGET-40-PAKFVX	Male	Unknown	Not Hispanic or Latino	5407	Relapse	361	Alive	922	2000	2003	P9754	Non-metastatic		Leg/foot	Femur	Left	Distal	Limb sparing	Yes	Other bone	361	NA	NA	NA		90			NA	NA	NA
TARGET-40-PAKXLD	Female	White	Not Hispanic or Latino	5245	Relapse	578	Alive	2462	2001	2008	P9754	Non-metastatic		Arm/hand	Humerus	Right	Proximal		Yes	Lung	578	NA	NA	NA		30			NA	NA	NA
TARGET-40-PAKZZK	Male	White	Not Hispanic or Latino	4864	Relapse	452	Dead	1515	2001	2005	P9754	Non-metastatic		Leg/foot	Femur	Right	Distal	Limb sparing	Yes	Lung	452	NA	NA	1515		30			NA	NA	NA
TARGET-40-PAKUZU	Male	Asian	Not Hispanic or Latino	7270	No event	0	Alive	0	2001	2001	P9851	Non-metastatic		Leg/foot	Femur						NA	NA	NA	NA					NA	NA	NA
TARGET-40-PALECC	Female	Unknown	Hispanic or Latino	3661	Relapse	384	Dead	754	2001	2003	P9851	Non-metastatic		Arm/hand	Arm NOS	Left			Yes	Lung	384	NA	NA	754					NA	NA	NA
TARGET-40-PALFYN	Female	White	Unknown	4841	Relapse	651	Dead	1003	2001	2004	P9851	Non-metastatic		Leg/foot	Femur	Left			Yes		651	NA	NA	1003					NA	NA	NA
TARGET-40-PALHRL	Male	Black or African American	Not Hispanic or Latino	6019	No event	4374	Alive	4374	2002	2013	P9851	Metastatic	Lung only	Leg/foot	Femur	Left					NA	NA	NA	NA					NA	NA	NA
TARGET-40-PALKDP	Female	White	Not Hispanic or Latino	3388	No event	3282	Alive	3282	2002	2011	P9851	Non-metastatic		Leg/foot	Femur	Left	Distal				NA	NA	NA	NA					NA	NA	NA
TARGET-40-PALKGN	Male	White	Not Hispanic or Latino	6190	No event	2122	Alive	2122	2002	2007	P9851	Non-metastatic		Leg/foot	Foot NOS						NA	NA	NA	NA					NA	NA	NA
TARGET-40-PALZGU	Male	White	Not Hispanic or Latino	5603	Relapse	1452	Dead	2882	2002	2010	P9851	Non-metastatic		Leg/foot	Femur	Right	Distal		Yes	Other bone	1452	NA	NA	2882					NA	NA	NA
TARGET-40-PAMHLF	Male	White	Not Hispanic or Latino	3233	No event	1913	Alive	1913	2003	2008	P9851	Non-metastatic		Leg/foot	Leg NOS						NA	NA	NA	NA					NA	NA	NA
TARGET-40-PAMHYN	Female	Asian	Not Hispanic or Latino	3499	No event	3900	Alive	3900	2003	2014	P9851	Non-metastatic		Leg/foot	Leg NOS						NA	NA	NA	NA					NA	NA	NA
TARGET-40-PAMJXS	Male	Black or African American	Not Hispanic or Latino	4100	Relapse	3184	Alive	3862	2003	2014	P9851	Non-metastatic		Leg/foot	Leg NOS				Yes		3184	NA	NA	3976					NA	NA	NA
TARGET-40-PAMTCM	Female	Black or African American	Not Hispanic or Latino	4938	No event	3002	Alive	3002	2003	2012	P9851	Non-metastatic		Leg/foot	Leg NOS						NA	NA	NA	NA					NA	NA	NA
TARGET-40-PANGPE	Male	White	Not Hispanic or Latino	4794	SMN	833	Alive	3378	2004	2014	P9851	Non-metastatic		Leg/foot	Femur	Right					NA	NA	833	NA					NA	NA	NA
TARGET-40-PANGRW	Male	White	Not Hispanic or Latino	6088	No event	3378	Alive	3378	2004	2014	P9851	Non-metastatic		Leg/foot	Femur	Left	Distal				NA	NA	NA	NA					NA	NA	NA
TARGET-40-PANSEN	Male	White	Not Hispanic or Latino	5234	No event	2256	Alive	2256	2005	2011	P9851	Non-metastatic		Leg/foot	Tibia	Left	Proximal				NA	NA	NA	NA					NA	NA	NA
TARGET-40-PANVJJ	Female	White	Unknown	5044	No event	3095	Alive	3095	2005	2014	P9851	Non-metastatic		Leg/foot	Tibia	Left					NA	NA	NA	NA					NA	NA	NA
TARGET-40-PANXSC	Male	White	Not Hispanic or Latino	5545	Relapse	366	Alive	1217	2005	2008	P9851	Non-metastatic		Leg/foot	Femur	Right	Distal		Yes	Lung	366	373	NA	NA					NA	NA	NA
TARGET-40-PANZZJ	Male	White	Not Hispanic or Latino	6855	No event	1538	Alive	1538	2005	2009	P9851	Non-metastatic		Leg/foot	Leg NOS						NA	NA	NA	NA					NA	NA	NA
TARGET-40-0A4I65	Male			6520	Relapse	1993	Alive	2895	NA	NA	STB	Non-metastatic	Lung only	Leg/foot	Tibia		PRoximal	Amputation	No	Lung	1993	NA	NA	NA	Stage 1/2	80	Systemic	Adria/Plat	NA	NA	NA
TARGET-40-0A4I9K	Male			8237		2257	Alive	2257	NA	NA	STB	Non-metastatic		Leg/foot	Tibia		Proximal	Limb Sparing	No		NA	NA	NA	NA	Stage 1/2	50		Adria/Plat	NA	NA	NA
